# Supplementary material
Source: publisher figshare collection journal article supplement (https://springernature.figshare.com/ndownloader/files/23468024)
Supplement: Supplementary file 1 [file 23468024]

## Sheet: Def
Id	Year	Month	Season	Hour	Temperature	Humidity	Wind	Prec	Region	Lat	Long	Place	Functional_group	Sp	Sex	Age	Number	Site	With_perch_supp	In_place_supp	Risk	Simultaneous	Wood	Bush	Pasture	Crops	Other	CDDA
1	2012	4	Prim	17:00:00	11	80	8	1.2	BB	-7.071	39.8685	Zebreira	GA	Aquila_adalberti	H	Inm	1	B1	0	NA	4	0	0	10.92	0	0	0	0
2	2012	4	Prim	18:18:00	11	80	8	1.2	BB	-7.071	39.8685	Zebreira	GA	Aquila_adalberti	M	Juv	2	A1	0	NA	2	1	0	10.92	0	0	0	0
3	2012	4	Prim	18:18:00	11	80	8	1.2	BB	-7.071	39.8685	Zebreira	GA	Aquila_adalberti	H	Inm	2	B1	0	NA	4	1	0	10.92	0	0	0	0
4	2013	3	Prim	12:07:00	11	43	6	0	BB	-7.071	39.8685	Zebreira	GA	Aquila_adalberti	M	Inm	1	A1	0	NA	2	0	0	10.92	0	0	0	0
5	2013	12	Inv	11:52:00	9	74	8	0	BB	-7.299	39.74	Monforte da Beira	GA	Aquila_adalberti	H	Ad	1	Pos1	1	1	0	0	33.33	0	0	268.26	268.26	0
6	2014	1	Inv	12:13:00	17	55	5	0	BB	-7.071	39.8685	Zebreira	GA	Aquila_adalberti	M	Inm	2	B1	0	NA	4	1	0	10.92	0	0	0	0
7	2014	1	Inv	12:13:00	17	55	5	0	BB	-7.071	39.8685	Zebreira	GA	Aquila_adalberti	H	Ad	2	A1	0	NA	2	1	0	10.92	0	0	0	0
8	2014	3	Prim	18:55:00	17	55	8	0	BB	-7.071	39.8685	Zebreira	GA	Aquila_adalberti	M	Ad	1	B1	0	NA	4	0	0	10.92	0	0	0	0
9	2014	7	Ver	11:34:00	26	52	13	0.2	Bal	-7.318	37.9296	Vilaverde de Filcalho	GA	Circaetus_gallicus	NA	Ad	1	A1	0	NA	2	0	44.65	0	0	263.38	263.38	0
10	2014	7	Ver	11:36:00	26	52	13	0.2	Bal	-7.394	37.873	Aldea nova de Sao Bento	GA	Circaetus_gallicus	NA	Juv	1	Pos2	1	1	1	0	0	0	0	0	314.01	0
11	2015	8	Ver	11:30:00	33	24	3	0	AA	-7.44	39.052	Monforte	GA	Aquila_adalberti	H	Ad	1	A1	0	NA	2	0	9.7	0	0	0	214.27	0
12	2015	12	Inv	08:30:00	18	51	4	0	BB	-7.071	39.8685	Zebreira	GA	Aquila_adalberti	H	Juv	1	B1	1	0	4	0	0	10.92	0	0	0	0
13	2015	12	Inv	12:00:00	20	67	20	0	Bal	-7.67	37.51	Besteiros	GA	Aquila_fasciata	M	Ad	1	B1	1	0	3	0	0	57.71	0	0	177.34	1
14	2015	12	Inv	08:30:00	20	44	9	0	Bal	-7.8078	37.6323	Romeiras	PR	Elanus_caeruleus	NA	Ad	1	Pos1	1	1	0	0	0	100.07	0	0	189.19	0
15	2015	12	Inv	11:30:00	23	48	18	0	Bal	-7.837	37.6776	Joao Serra	RM	Buteo_buteo	NA	Ad	1	B1	1	0	3	0	0	0	0	153.59	0	1
16	2015	12	Inv	11:35:00	23	48	18	0	Bal	-7.837	37.6776	Joao Serra	RM	Buteo_buteo	NA	Ad	1	B1	1	0	3	0	0	0	0	153.59	0	1
17	2015	12	Inv	12:43:00	23	48	18	0	Bal	-7.8966	37.6361	Figueirinha	RM	Buteo_buteo	NA	Ad	1	Pos1	1	1	0	0	0	0	0	47.79	260.69	1
18	2015	12	Inv	12:50:00	23	48	18	0	Bal	-7.8966	37.6361	Figueirinha	RM	Buteo_buteo	NA	Ad	1	B1	1	0	3	0	0	0	0	260.69	260.69	1
19	2015	12	Inv	13:00:00	23	48	18	0	Bal	-7.8966	37.6361	Figueirinha	RM	Buteo_buteo	NA	Ad	1	B3	1	0	8.226	0	0	0	0	260.69	260.69	1
20	2015	12	Inv	13:13:00	23	48	18	0	Bal	-7.8078	37.6323	Romeiras	PR	Elanus_caeruleus	NA	Ad	1	Pos1	1	1	0	0	0	100.07	0	0	189.19	0
21	2015	12	Inv	18:00:00	18	60	11	0	Bal	-7.394	37.873	Aldea nova de Sao Bento	RM	Buteo_buteo	M	Ad	2	A1	1	0	2	1	0	0	0	0	314.01	0
22	2015	12	Inv	18:00:00	18	60	11	0	Bal	-7.394	37.873	Aldea nova de Sao Bento	RM	Buteo_buteo	H	Ad	2	B1	1	0	3	1	0	0	0	0	314.01	0
23	2015	12	Inv	15:00:00	17	54	9	0	Bal	-7.837	37.6776	Joao Serra	PR	Elanus_caeruleus	NA	Ad	1	Pos1	1	1	0	0	0	0	0	153.59	0	1
24	2015	12	Inv	16:00:00	16	47	2	0	Bal	-7.5013	37.8075	Vales mortos	PR	Elanus_caeruleus	NA	Ad	1	Pos1	1	1	0	0	95.63	0	0	91.28	0	0
25	2015	12	Inv	16:30:00	16	47	2	0	Bal	-7.394	37.873	Aldea nova de Sao Bento	RM	Buteo_buteo	NA	Ad	1	B1	1	0	3	0	0	0	0	0	314.01	0
26	2015	12	Inv	16:40:00	16	47	2	0	Bal	-7.394	37.873	Aldea nova de Sao Bento	PR	Elanus_caeruleus	NA	Ad	1	Pos1	1	1	0	0	0	0	0	0	314.01	0
27	2015	12	Inv	16:45:00	16	47	2	0	Bal	-7.394	37.873	Aldea nova de Sao Bento	RM	Buteo_buteo	NA	Ad	1	B1	1	0	3	0	0	0	0	0	314.01	0
28	2015	12	Inv	16:45:00	16	47	2	0	Bal	-7.394	37.873	Aldea nova de Sao Bento	PR	Elanus_caeruleus	NA	Ad	1	B1	1	0	3	0	0	0	0	0	314.01	0
29	2015	12	Inv	16:50:00	16	47	2	0	Bal	-7.394	37.873	Aldea nova de Sao Bento	PR	Falco_tinnunculus	M	Ad	1	B1	1	0	3	0	0	0	0	0	314.01	0
30	2015	12	Inv	16:57:00	16	47	2	0	Bal	-7.318	37.9296	Vilaverde de Filcalho	PR	Elanus_caeruleus	NA	Ad	1	Pos1	1	1	0	0	44.65	0	0	263.38	263.38	0
31	2015	12	Inv	17:10:00	16	47	2	0	Bal	-7.318	37.9296	Vilaverde de Filcalho	PR	Elanus_caeruleus	NA	Ad	1	Pos1	1	1	0	0	44.65	0	0	263.38	263.38	0
32	2016	1	Inv	09:20:00	13	89	6	0	Bal	-7.66	37.641	Mertola	RM	Buteo_buteo	H	Ad	1	B1	1	0	3	0	89.41	0	0	24.99	24.99	1
33	2016	1	Inv	09:29:00	13	89	6	0	Bal	-7.806	37.614	Sao joao dos calderos	RM	Buteo_buteo	M	Ad	1	Pos1	1	1	0	0	0	134.7	0	0	0	0
34	2016	1	Inv	10:54:00	13	89	6	0	Bal	-7.832	37.6379	Ctra Romeiras-Pelinhos	PR	Elanus_caeruleus	NA	Ad	1	Pos1	1	1	0	0	0	11.58	0	49.87	49.87	0
35	2016	1	Inv	10:55:00	13	89	6	0	Bal	-7.832	37.6379	Ctra Romeiras-Pelinhos	PR	Elanus_caeruleus	NA	Ad	1	Pos1	1	1	0	0	0	11.58	0	49.87	49.87	0
36	2016	1	Inv	10:56:00	13	89	6	0	Bal	-7.832	37.6379	Ctra Romeiras-Pelinhos	PR	Elanus_caeruleus	NA	Ad	1	Pos1	1	1	0	0	0	11.58	0	49.87	49.87	0
37	2016	1	Inv	13:10:00	13	89	6	0	Bal	-7.83	37.58	Repetidor Preiras	RM	Buteo_buteo	M	Ad	1	B1	1	0	3	0	0	0	0	89.19	89.19	0
38	2016	1	Inv	13:50:00	13	89	6	0	Bal	-7.83	37.58	Ctra Almodovar - Mte Pereiras	RM	Buteo_buteo	NA	NA	1	Pos1	1	1	0	0	0	0	0	89.19	89.19	0
39	2016	1	Inv	13:50:00	13	89	6	0	Bal	-7.83	37.58	Ctra Almodovar - Mte Pereiras	RM	Buteo_buteo	NA	NA	1	Pos1	1	1	0	0	0	0	0	89.19	89.19	0
40	2016	1	Inv	13:50:00	15	87	10	0	AlCe	-7.2556	38.301	Granja	RM	Buteo_buteo	NA	Ad	1	B2	1	0	3	0	0	0	0	87.68	87.68	1
41	2016	1	Inv	16:48:00	16	68	12	0.1	Bal	-7.394	37.873	Aldea nova de Sao Bento	RM	Buteo_buteo	NA	NA	1	B2	1	0	3	0	0	0	0	0	314.01	0
42	2016	1	Inv	17:00:00	16	68	12	0.1	Bal	-7.394	37.873	Aldea nova de Sao Bento	PR	Falco_tinnunculus	M	Ad	1	A1	1	0	2	0	0	0	0	0	314.01	0
43	2016	1	Inv	17:14:00	13	91	7	0.1	Bal	-7.2293	38.2067	Amaraleja	PR	Elanus_caeruleus	NA	Ad	1	Pos1	1	1	0	0	16.93	0	0	140.02	140.02	0
44	2016	1	Inv	17:14:00	16	68	12	0.1	Bal	-7.319	37.93	Ficalho	PR	Falco_tinnunculus	M	Ad	1	B1	1	0	3	0	44.65	0	0	263.38	263.38	0
45	2016	1	Inv	17:42:00	15	87	10	0	AlCe	-7.2556	38.301	Granja	PR	Falco_tinnunculus	M	Ad	1	A1	1	0	2	0	0	0	0	87.68	87.68	1
46	2016	1	Inv	17:43:00	15	87	10	0	AlCe	-7.2556	38.301	Granja	RM	Buteo_buteo	NA	Ad	1	Pos1	1	1	0	0	0	0	0	87.68	87.68	1
47	2016	1	Inv	17:47:00	15	87	10	0	AlCe	-7.2556	38.301	Granja	RM	Buteo_buteo	NA	Ad	1	A1	1	0	2	0	0	0	0	87.68	87.68	1
48	2016	1	Inv	11:00:00	16	70	5	0	BB	-7.3214	40.015	Sao Miguel de Acha	RM	Buteo_buteo	NA	NA	1	B2	0	NA	3	0	63.74	0	0	0	224.4	0
49	2016	2	Inv	09:28:00	16	69	4	0	BB	-7.3214	40.015	Sao Miguel de Acha	RM	Buteo_buteo	M	Ad	1	B2	0	NA	3	0	63.74	0	0	0	224.4	0
50	2016	2	Inv	09:28:00	16	69	4	0	BB	-7.3214	40.015	Sao Miguel de Acha	RM	Buteo_buteo	H	Ad	1	B1	0	NA	3	0	63.74	0	0	0	224.4	0
51	2016	2	Inv	12:18:00	19	47	4	0	BB	-7.3214	40.015	Sao Miguel de Acha	RM	Buteo_buteo	NA	Ad	1	A1	0	NA	2	0	63.74	0	0	0	224.4	0
52	2016	2	Inv	16:07:00	17	44	5	0	BB	-7.135	39.721	Rosmaninhal	RM	Buteo_buteo	NA	Ad	1	B1	1	0	3	0	61.71	39.52	0	0	144.16	0
53	2016	2	Inv	16:30:00	17	44	5	0	BB	-7.135	39.721	Rosmaninhal	RM	Buteo_buteo	NA	Ad	1	B2	1	0	3	0	61.71	39.52	0	0	144.16	0
54	2016	2	Inv	16:57:00	16	58	18	0	BB	-6.9531	39.906	Salvaterra do extremo	RM	Buteo_buteo	NA	NA	1	B1	0	NA	3	0	166.13	0	0	0	0	0
55	2016	2	Inv	17:02:00	16	58	18	0	BB	-6.932	39.9692	Monfortinho	PR	Elanus_caeruleus	NA	Ad	1	A1	0	NA	2	0	0	34.37	0	123.3	123.3	0
56	2016	2	Inv	17:20:00	19	47	4	0	BB	-7.3214	40.015	Sao Miguel de Acha	RM	Buteo_buteo	NA	Ad	1	B1	0	NA	3	0	63.74	0	0	0	224.4	0
57	2016	2	Inv	08:59:00	15	71	6	0	BB	-6.932	39.9692	Monfortinho	PR	Elanus_caeruleus	NA	Ad	1	Pos1	1	1	0	0	0	34.37	0	123.3	123.3	0
58	2016	2	Inv	09:17:00	15	78	14	0	BB	-7.071	39.8685	zebreira	RM	Buteo_buteo	H	Ad	1	A1	0	NA	2	0	0	10.92	0	0	0	0
59	2016	2	Inv	09:47:00	15	78	14	0	BB	-6.932	39.9692	Monfortinho	RM	Buteo_buteo	H	Ad	2	A1	0	NA	2	1	0	34.37	0	123.3	123.3	0
60	2016	2	Inv	09:47:00	15	78	14	0	BB	-6.932	39.9692	Monfortinho	RM	Buteo_buteo	M	Ad	2	B1	0	NA	3	1	0	34.37	0	123.3	123.3	0
61	2016	2	Inv	09:52:00	15	78	14	0	BB	-6.9531	39.906	Salvaterra do extremo	RM	Buteo_buteo	NA	Ad	1	A1	0	NA	2	0	166.13	0	0	0	0	0
62	2016	2	Inv	09:57:00	15	78	14	0	BB	-6.9531	39.906	Salvaterra do extremo	PR	Elanus_caeruleus	NA	Ad	1	A1	0	NA	2	0	166.13	0	0	0	0	0
63	2016	2	Inv	10:06:00	15	78	14	0	BB	-7.071	39.8685	zebreira	RM	Buteo_buteo	H	Ad	1	A1	0	NA	2	0	0	10.92	0	0	0	0
64	2016	2	Inv	17:35:00	11	62	15	0	BB	-7.135	39.721	Rosmaninhal	RM	Buteo_buteo	NA	Ad	1	B1	0	NA	3	0	61.71	39.52	0	0	144.16	0
65	2016	2	Inv	17:45:00	11	62	15	0	BB	-7.071	39.8685	Zebreira	RM	Buteo_buteo	NA	Ad	1	B1	0	NA	3	0	0	10.92	0	0	0	0
66	2016	2	Inv	17:57:00	12	75	12	0	BB	-6.9531	39.906	Salvaterra do extremo	RM	Buteo_buteo	NA	Ad	1	B1	0	NA	3	0	166.13	0	0	0	0	0
67	2016	2	Inv	10:53:00	12	84	20	0.1	BB	-6.9531	39.906	Salvaterra do extremo	RM	Buteo_buteo	NA	Ad	1	B2	0	NA	3	0	166.13	0	0	0	0	0
68	2016	2	Inv	10:59:00	12	84	20	0.1	BB	-6.9531	39.906	Salvaterra do extremo	RM	Buteo_buteo	NA	Ad	1	Pos1	1	1	0	0	0	0	0	0	0	0
69	2016	2	Inv	12:30:00	12	84	20	0.1	BB	-7.135	39.721	Rosmaninhal	RM	Buteo_buteo	H	Ad	1	B2	0	NA	3	0	61.71	39.52	0	0	144.16	0
70	2016	2	Inv	12:31:00	12	84	20	0.1	BB	-7.135	39.721	Rosmaninhal	RM	Buteo_buteo	M	Ad	1	A1	0	NA	2	0	61.71	39.52	0	0	144.16	0
71	2016	2	Inv	12:31:00	12	84	20	0.1	BB	-7.135	39.721	Rosmaninhal	RM	Buteo_buteo	H	Ad	1	B1	0	NA	3	0	61.71	39.52	0	0	144.16	0
72	2016	2	Inv	12:57:00	12	84	20	0.1	BB	-7.135	39.721	Rosmaninhal	RM	Buteo_buteo	NA	Ad	1	B1	0	NA	3	0	61.71	39.52	0	0	144.16	0
75	2016	2	Inv	17:30:00	7	57	12	0	BB	-7.299	39.74	Monforte da Beira	RM	Buteo_buteo	NA	Ad	1	B1	1	0	3	0	33.33	0	0	268.26	268.26	0
76	2016	2	Inv	10:40:00	11	54	17	0	AA	-7.3926	39.1409	Assumar	GA	Aquila_adalberti	H	Juv	1	A1	0	NA	2	0	126.1	0	0	72.77	72.77	0
77	2016	2	Inv	13:10:00	11	54	17	0	AA	-7.3926	39.1409	Assumar	GA	Aquila_adalberti	H	Juv	1	A1	0	NA	2	0	126.1	0	0	72.77	72.77	0
78	2016	2	Inv	13:36:00	10	61	24	0	AA	-7.3926	39.1409	Assumar	GA	Aquila_adalberti	H	Juv	1	A1	0	NA	2	0	126.1	0	0	72.77	72.77	0
79	2016	2	Inv	13:40:00	10	61	24	0	AA	-7.3926	39.1409	Assumar	RM	Buteo_buteo	NA	Ad	1	B1	0	NA	3	0	126.1	0	0	72.77	72.77	0
80	2016	2	Inv	13:40:00	10	61	24	0	AA	-7.3926	39.1409	Assumar	RM	Buteo_buteo	NA	Ad	1	B2	0	NA	3	0	126.1	0	0	72.77	72.77	0
81	2016	2	Inv	13:40:00	10	61	24	0	AA	-7.3926	39.1409	Assumar	RM	Buteo_buteo	NA	Ad	1	A1	0	NA	2	0	126.1	0	0	72.77	72.77	0
82	2016	2	Inv	10:00:00	10	86	20	0	AA	-7.32	39.16	Mosteiros	RM	Buteo_buteo	NA	Ad	1	B1	0	NA	3	0	188.96	0	0	26.53	26.53	1
83	2016	2	Inv	17:50:00	10	66	5	0	AA	-7.418	38.9213	Santo Aleixo	PR	Elanus_caeruleus	NA	Ad	1	A1	0	NA	2	0	50.19	0	0	112.72	112.72	0
84	2016	2	Inv	17:53:00	10	66	5	0	AA	-7.418	38.9213	Santo Aleixo	RM	Buteo_buteo	NA	Ad	1	B1	1	0	3	0	50.19	0	0	112.72	112.72	0
85	2016	2	Inv	18:30:00	13	62	5	0	Bal	-7.394	37.873	Aldea nova de Sao Bento	PR	Elanus_caeruleus	NA	Ad	1	Pos1	1	1	0	0	0	0	0	0	314.01	0
86	2016	2	Inv	18:30:00	12	71	12	0	Bal	-7.8078	37.6323	Romeiras	PR	Falco_tinnunculus	M	Ad	1	B2	1	0	3	0	0	100.07	0	0	189.19	0
87	2016	2	Inv	08:40:00	14	84	11	0	Bal	-7.8966	37.6361	Figueirinha	RM	Buteo_buteo	NA	Ad	1	Pos1	1	1	0	0	0	0	0	260.69	260.69	1
88	2016	2	Inv	08:41:00	14	84	11	0	Bal	-7.8966	37.6361	Figueirinha	RM	Buteo_buteo	M	Ad	1	Pos1	1	1	0	0	0	0	0	260.69	260.69	1
89	2016	2	Inv	08:48:00	14	84	11	0	Bal	-7.8966	37.6361	Figueirinha	RM	Buteo_buteo	H	Ad	1	Pos1	1	1	0	0	0	0	0	260.69	260.69	1
90	2016	2	Inv	09:45:00	14	84	11	0	Bal	-7.8078	37.6323	Romerías	RM	Buteo_buteo	NA	Ad	1	Pos1	1	1	0	0	0	100.07	0	0	189.19	0
91	2016	2	Inv	12:00:00	14	66	16	0.1	Bal	-8.0854	37.7005	Castroverde	PR	Falco_tinnunculus	M	Ad	1	Pos1	1	1	0	0	0	0	0	56.73	56.73	0
92	2016	2	Inv	08:33:00	13	86	25	0.3	Bal	-7.7614	37.6528	Corte pao e agua	PR	Elanus_caeruleus	NA	Ad	1	Pos1	1	1	0	0	0	20.14	0	268.77	268.77	1
93	2016	2	Inv	08:34:00	13	86	25	0.3	Bal	-7.7614	37.6528	Corte pao e agua	PR	Elanus_caeruleus	NA	Ad	1	Pos1	1	1	0	0	0	20.14	0	268.77	268.77	1
94	2016	2	Inv	08:34:00	13	86	25	0.3	Bal	-7.7614	37.6528	Corte pao e agua	PR	Falco_tinnunculus	NA	NA	1	B1	1	0	3	0	0	20.14	0	268.77	268.77	1
95	2016	2	Inv	17:19:00	9	81	28	0.9	Bal	-7.318	37.9296	Vilaverde de Filcalho	PR	Elanus_caeruleus	NA	Ad	1	Pos1	1	1	0	0	44.65	0	0	263.38	263.38	0
96	2016	3	Prim	08:55:00	16	55	6	0	Bal	-7.85364	37.6912	Aipo	RM	Buteo_buteo	NA	Ad	1	B1	1	0	3	0	0	0	0	0	0	0
97	2016	3	Prim	10:45:00	16	56	11	0	Bal	-7.9157	37.573	Caiada	GA	Aquila_fasciata	m	Ad	1	B3	1	0	9.236	0	0	17.84	0	171.78	171.78	0
98	2016	3	Prim	00:00:00	20	54	21	0	Bal	-7.8186	37.6799	Meceares	RM	Buteo_buteo	NA	Ad	1	Pos1	1	1	0	0	0	0	0	0	0	0
99	2016	3	Prim	08:32:00	17	85	17	0	Bal	-7.8186	37.6799	Meceares	RM	Buteo_buteo	NA	Ad	1	B2	1	0	3	0	0	0	0	0	0	0
100	2016	3	Prim	10:34:00	19	54	13	0	AlCe	-7.5588	38.71	Rivera de Limas	GA	Circaetus_gallicus	NA	Ad	1	Pos1	1	1	0	0	80.43	0	0	0	129.05	0
101	2016	3	Prim	12:55:00	15	56	44	0	BB	-7.299	39.74	Monforte da Beira	PR	Falco_tinnunculus	M	Ad	1	B2	1	0	3	0	33.33	0	0	268.26	268.26	0
102	2016	3	Prim	15:16:00	16	36	5	0	BB	-7.299	39.74	Monforte da Beira	RM	Buteo_buteo	NA	Ad	1	B1	0	NA	3	0	33.33	0	0	268.26	268.26	0
103	2016	3	Prim	17:18:00	14	43	4	0	AA	-7.4281	39.2961	Portalegre	RM	Buteo_buteo	NA	Ad	1	B1	0	NA	3	0	107.28	0	0	0	104.75	1
104	2016	3	Prim	17:25:00	14	43	4	0	AA	-7.4281	39.2961	Portalegre	RM	Buteo_buteo	NA	Ad	1	B1	0	NA	3	0	107.28	0	0	0	104.75	1
105	2016	3	Prim	17:56:00	13	54	4	0	AA	-7.013	39.6792	Erjas	RM	Buteo_buteo	NA	Ad	1	B1	0	NA	3	0	105.19	133.47	28.91	0	0	0
106	2016	3	Prim	08:05:00	14	78	11	0	Bal	-7.66	37.641	Mertola	RM	Buteo_buteo	NA	Ad	1	Pos1	1	1	0	0	89.41	73.72	0	24.99	24.99	1
107	2016	3	Prim	08:08:00	14	78	11	0	Bal	-7.66	37.641	Mertola	RM	Buteo_buteo	NA	Ad	1	Pos1	1	1	0	0	89.41	73.72	0	24.99	24.99	1
108	2016	3	Prim	16:40:00	14	72	18	0.1	Bal	-7.9157	37.573	Caiada	PR	Falco_tinnunculus	M	Ad	1	Pos1	1	1	0	0	0	17.84	0	171.78	171.78	0
109	2016	3	Prim	10:40:00	15	87	10	0	Bal	-7.837	37.6776	Joao Serra	PR	Elanus_caeruleus	NA	Ad	1	Pos1	1	1	0	0	0	0	0	153.59	0	1
110	2016	3	Prim	15:48:00	16	47	15	0	Bal	-7.8186	37.6799	Meceares	PR	Falco_tinnunculus	M	Ad	1	A1	1	0	2	0	0	0	0	141.22	0	0
111	2016	3	Prim	17:20:00	11	69	15	0	Bal	-7.8186	37.6799	Meceares	PR	Falco_tinnunculus	M	Ad	1	B2	1	0	3	0	0	0	0	141.22	0	0
112	2016	3	Prim	18:15:00	11	69	15	0	Bal	-7.837	37.6776	Joao Serra	RM	Buteo_buteo	NA	Ad	1	B1	1	0	3	0	0	0	0	153.59	0	1
113	2016	3	Prim	18:25:00	11	69	15	0	Bal	-7.837	37.6776	Joao Serra	RM	Buteo_buteo	NA	Ad	1	B1	1	0	3	0	0	0	0	153.59	0	1
114	2016	3	Prim	19:00:00	11	69	15	0	Bal	-7.8186	37.6799	Meceares	GA	Circaetus_gallicus	NA	Ad	1	Pos1	1	1	0	0	0	0	0	141.22	0	0
115	2016	3	Prim	08:55:00	16	80	6	0	Bal	-7.9157	37.573	Caiada	RM	Buteo_buteo	NA	Ad	1	B2	1	0	3	0	0	17.84	0	51.63	171.78	0
116	2016	3	Prim	10:00:00	17	77	17	0	Bal	-8.08579	37.4838	Almodovar	RM	Buteo_buteo	NA	Ad	1	Pos1	1	1	0	0	215.16	0	0	0	0	0
117	2016	3	Prim	10:00:00	16	80	6	0	Bal	-7.9157	37.573	Caiada	RM	Buteo_buteo	NA	Ad	1	Pos1	1	1	0	0	0	17.84	0	171.78	171.78	0
118	2016	3	Prim	10:00:00	16	80	6	0	Bal	-7.9157	37.573	Caiada	GA	Circaetus_gallicus	NA	Ad	1	B1	1	0	4	0	0	17.84	0	171.78	171.78	0
119	2016	3	Prim	15:00:00	18	47	17	0	Bal	-7.8966	37.6361	Figueirinha	PR	Falco_tinnunculus	M	Ad	1	B1	1	0	3	0	0	0	0	260.69	260.69	1
120	2016	3	Prim	15:02:00	18	47	17	0	Bal	-7.8966	37.6361	Figueirinha	RM	Buteo_buteo	M	Ad	2	B1	1	0	3	1	0	0	0	260.69	260.69	1
121	2016	3	Prim	15:02:00	18	47	17	0	Bal	-7.8966	37.6361	Figueirinha	RM	Buteo_buteo	H	Ad	2	B1	1	0	3	1	0	0	0	260.69	260.69	1
122	2016	3	Prim	15:30:00	18	47	17	0	Bal	-7.7341	37.64	Morena	PR	Falco_tinnunculus	M	Ad	1	B1	1	0	3	0	36.44	0	0	0	0	1
123	2016	3	Prim	09:13:00	15	89	2	1.5	Bal	-7.863	37.703	Monte da Legua	RM	Buteo_buteo	NA	Ad	1	Pos1	1	1	0	0	0	0	0	282.95	0	0
124	2016	3	Prim	09:15:00	15	89	2	1.5	Bal	-7.85364	37.6912	Aipo	RM	Buteo_buteo	NA	Ad	1	B1	1	0	3	0	0	0	0	159.43	0	0
125	2016	3	Prim	09:21:00	15	88	2	1.5	Bal	-7.8186	37.6799	Meceares	GA	Circaetus_gallicus	NA	Ad	1	B1	1	0	4	0	0	0	0	141.22	0	0
126	2016	3	Prim	10:21:00	15	88	2	1.5	Bal	-7.8186	37.6799	Meceares	PR	Falco_tinnunculus	H	Ad	1	B1	1	0	3	0	0	0	0	141.22	0	0
127	2016	3	Prim	10:24:00	15	88	2	1.5	Bal	-7.8186	37.6799	Meceares	PR	Falco_tinnunculus	M	Ad	1	B2	1	0	3	0	0	0	0	141.22	0	0
128	2016	3	Prim	10:24:00	15	89	2	1.5	Bal	-7.7341	37.64	Morena	PR	Falco_tinnunculus	M	Ad	1	B2	1	0	3	0	36.44	0	0	86.57	0	1
129	2016	3	Prim	10:28:00	15	89	2	1.5	Bal	-7.7614	37.6528	Corte pao e agua	PR	Falco_tinnunculus	H	Ad	1	B1	1	0	3	0	0	20.14	0	268.77	268.77	1
130	2016	3	Prim	10:34:00	15	89	2	1.5	Bal	-7.7614	37.6528	Corte pao e agua	PR	Falco_tinnunculus	M	Ad	1	B2	1	0	3	0	0	20.14	0	268.77	268.77	1
131	2016	3	Prim	12:30:00	18	61	10	0	Bal	-7.78391	37.6	Simoes	PR	Falco_tinnunculus	M	Ad	1	B1	1	0	3	0	0	172.36	0	0	0	0
132	2016	3	Prim	12:30:00	18	61	10	0	Bal	-7.78391	37.6	Simoes	GA	Circaetus_gallicus	NA	Inm	1	B1	1	0	4	0	0	172.36	0	0	0	0
133	2016	3	Prim	12:24:00	12	42	19	0	BB	-7.3954	39.8859	Escalos de baixo	GA	Circaetus_gallicus	NA	Ad	1	Pos1	1	1	0	0	23.18	0	37.5	220.37	220.37	0
134	2016	3	Prim	12:35:00	21	42	5	0	BB	-7.299	39.74	Monforte da Beira	PR	Falco_tinnunculus	H	Ad	1	A1	0	NA	2	0	33.33	0	0	268.26	268.26	0
135	2016	3	Prim	16:57:00	20	48	13	0	BB	-6.9531	39.906	Salvaterra do extremo	GA	Circaetus_gallicus	NA	Ad	1	A1	0	NA	2	0	166.13	0	0	0	0	0
136	2016	3	Prim	10:10:00	14	84	2	0.1	BB	-6.9531	39.906	Salvaterra do extremo	RM	Milvusmigrans	NA	Ad	1	Pos1	1	1	0	0	166.13	0	0	0	0	0
137	2016	3	Prim	10:23:00	14	84	2	0.1	BB	-7.071	39.8685	Zebreira	GA	Circaetus_gallicus	NA	Ad	1	A1	0	NA	2	0	0	10.92	0	0	0	0
138	2016	3	Prim	13:00:00	16	73	19	0.2	BB	-7.19888	39.7402	Cegonhas	RM	Buteo_buteo	NA	Ad	1	A1	0	NA	2	0	25.18	26.53	10.16	0	143.42	1
139	2016	4	Prim	10:35:00	19	48	19	0	BB	-7.3214	40.015	Sao Miguel de Acha	RM	Buteo_buteo	M	Ad	1	B1	0	NA	3	0	63.74	0	0	0	224.4	0
140	2016	4	Prim	14:50:00	22	31	16	0	Bal	-7.852	37.643	Pelinhos	RM	Buteo_buteo	M	Ad	1	B3	1	0	8.226	0	0	0	0	110.73	110.73	0
141	2016	4	Prim	14:53:00	22	31	16	0	Bal	-7.852	37.643	Pelinhos	PR	Falco_tinnunculus	H	Ad	1	B1	1	0	3	0	0	0	0	110.73	110.73	0
142	2016	4	Prim	18:30:00	16	51	14	0	Bal	-7.8186	37.6799	Meceares	RM	Buteo_buteo	M	Ad	1	Pos1	1	1	0	0	0	0	0	141.22	0	0
143	2016	4	Prim	18:30:00	16	51	14	0	Bal	-7.8186	37.6799	Meceares	RM	Buteo_buteo	H	Ad	1	Pos1	1	1	0	0	0	0	0	141.22	0	0
144	2016	4	Prim	18:30:00	16	51	14	0	Bal	-7.8186	37.6799	Meceares	PR	Falco_tinnunculus	H	Ad	1	B1	1	0	3	0	0	0	0	141.22	0	0
145	2016	4	Prim	11:40:00	14	68	30	0.5	BB	-7.3214	40.015	Sao Miguel de Acha	RM	Buteo_buteo	M	Ad	1	B3	0	NA	8.226	0	63.74	0	0	0	224.4	0
146	2016	4	Prim	11:45:00	14	68	30	0.5	BB	-7.3214	40.015	Sao Miguel de Acha	RM	Buteo_buteo	M	Ad	1	A1	0	NA	2	0	63.74	0	0	0	224.4	0
147	2016	4	Prim	10:00:00	17	70	12	0.2	Bal	-7.825	37.5768	Castanhos	GA	Circaetus_gallicus	NA	Ad	1	Pos1	1	1	0	0	0	0	0	89.19	89.19	0
148	2016	4	Prim	10:00:00	18	68	15	0	Bal	-7.8067	37.6137	Sao Joao dos Caldeiros	GA	Circaetus_gallicus	NA	Ad	1	Pos1	1	1	0	0	0	60.98	0	0	0	0
149	2016	4	Prim	10:00:00	18	68	15	0	Bal	-7.78391	37.6	Simoes	RM	Buteo_buteo	M	Ad	1	Pos1	1	1	0	0	0	172.36	0	0	0	0
150	2016	4	Prim	10:00:00	18	68	15	0	Bal	-7.78391	37.6	Simoes	PR	Falco_tinnunculus	H	Ad	1	B1	0	NA	3	0	0	172.36	0	0	0	0
151	2016	4	Prim	10:15:00	18	68	15	0	Bal	-7.8067	37.6137	Joao dos Caldeiros	GA	Circaetus_gallicus	NA	Ad	1	Pos1	1	1	0	0	0	60.98	0	0	0	0
152	2016	4	Prim	18:30:00	16	52	9	0	BB	-7.071	39.8685	Zebreira	RM	Buteo_buteo	M	Ad	1	B1	0	NA	3	0	0	10.92	0	0	0	0
153	2016	4	Prim	18:43:00	16	52	9	0	BB	-7.071	39.8685	Zebreira	PR	Elanus_caeruleus	NA	Ad	1	A1	0	NA	2	0	0	10.92	0	0	0	0
154	2016	5	Prim	09:28:00	19	45	18	0	AA	-7.17149	40.169	Penamacor	RM	Buteo_buteo	M	Ad	1	A1	0	NA	2	0	75.95	0	0	0	158.98	0
155	2016	5	Prim	16:54:00	19	43	14	0	BB	-7.135	39.721	Rosmaninhal	RM	Buteo_buteo	M	Ad	1	A1	0	NA	2	0	61.71	39.52	0	0	144.16	0
156	2016	5	Prim	20:33:00	15	32	13	0	Bal	-7.231	38.104	Safara	PR	Falco_tinnunculus	H	Ad	2	B3	1	0	6.782	1	0	0	0	245.68	245.68	1
157	2016	5	Prim	20:33:00	15	32	13	0	Bal	-7.231	38.104	Safara	PR	Falco_tinnunculus	M	Ad	2	B3	1	0	6.782	1	0	0	0	245.68	245.68	1
158	2016	5	Prim	20:51:00	17	42	14	0	Bal	-7.394	37.873	Aldea nova de Sao Bento	RM	Buteo_buteo	M	Ad	1	B1	1	0	3	0	0	0	0	0	314.01	0
159	2016	5	Prim	20:59:00	17	42	14	0	Bal	-7.394	37.873	Aldea nova de Sao Bento	RM	Buteo_buteo	M	Ad	1	B1	1	0	3	0	0	0	0	0	314.01	0
160	2016	5	Prim	21:03:00	17	42	14	0	Bal	-7.394	37.873	Aldea nova de Sao Bento	RM	Buteo_buteo	M	Ad	1	B1	1	0	3	0	0	0	0	0	314.01	0
161	2016	5	Prim	12:00:00	19	60	15	0	BB	-7.135	39.721	Rosmaninhal	RM	Buteo_buteo	M	Ad	1	B3	0	NA	8.226	0	61.71	39.52	0	0	144.16	0
162	2016	5	Prim	17:00:00	14	69	21	0.2	BB	-7.071	39.8685	Zebreira	RM	Buteo_buteo	NA	Ad	1	B1	0	NA	3	0	0	10.92	0	0	0	0
165	2016	5	Prim	14:00:00	24	43	7	0	BB	-7.071	39.8685	Zebreira	GA	Circaetus_gallicus	NA	Ad	1	A1	0	NA	2	0	0	10.92	0	0	0	0
166	2016	5	Prim	15:00:00	24	43	7	0	BB	-7.135	39.721	Rosmaninhal	RM	Buteo_buteo	M	Ad	1	Pos1	1	1	0	0	61.71	39.52	0	0	144.16	0
167	2016	5	Prim	11:00:00	28	37	10	0	Bal	-7.7614	37.6528	Corte pao e agua	GA	Circaetus_gallicus	NA	Inm	1	Pos1	1	1	0	0	0	20.14	0	268.77	268.77	1
168	2016	5	Prim	07:50:00	29	49	9	0	Bal	-7.394	37.873	Aldea nova de Sao Bento	RM	Buteo_buteo	NA	Ad	1	B1	1	0	3	0	0	0	0	0	314.01	0
169	2016	5	Prim	08:00:00	29	49	9	0	Bal	-7.394	37.873	Aldea nova de Sao Bento	RM	Buteo_buteo	NA	Ad	1	B1	1	0	3	0	0	0	0	0	314.01	0
170	2016	5	Prim	08:07:00	29	49	9	0	Bal	-7.394	37.873	Aldea nova de Sao Bento	RM	Buteo_buteo	NA	Ad	1	Pos1	1	1	0	0	0	0	0	0	314.01	0
171	2016	5	Prim	08:11:00	27	44	8	0	Bal	-7.319	37.93	Ficalho	PR	Elanus_caeruleus	NA	Ad	1	Pos1	1	1	0	0	44.65	0	0	263.38	263.38	0
172	2016	5	Prim	08:15:00	27	44	8	0	Bal	-7.319	37.93	Ficalho	RM	Buteo_buteo	NA	Ad	1	B1	1	0	3	0	44.65	0	0	263.38	263.38	0
173	2016	5	Prim	08:23:00	27	44	8	0	Bal	-7.231	38.104	Safara	PR	Elanus_caeruleus	NA	Ad	1	Pos1	1	1	0	0	0	0	0	245.68	245.68	1
174	2016	5	Prim	21:40:00	16	50	8	0	Bal	-7.231	38.104	Safara	PR	Falco_tinnunculus	M	Ad	1	B1	1	0	3	0	0	0	0	245.68	245.68	1
175	2016	5	Prim	21:41:00	16	50	8	0	Bal	-7.231	38.104	Safara	PR	Elanus_caeruleus	NA	Ad	1	Pos1	1	1	0	0	0	0	0	245.68	245.68	1
176	2016	5	Prim	21:43:00	16	50	8	0	Bal	-7.231	38.104	Safara	PR	Elanus_caeruleus	NA	Ad	1	Pos1	1	1	0	0	0	0	0	245.68	245.68	1
177	2016	5	Prim	22:00:00	16	50	8	0	Bal	-7.318	37.9296	Vilaverde de Filcalho	RM	Buteo_buteo	NA	Ad	1	B1	1	0	3	0	44.65	0	0	263.38	263.38	0
178	2016	5	Prim	19:00:00	21	53	5	0	BB	-7.135	39.721	Rosmaninhal	PR	Falco_tinnunculus	M	Ad	1	B3	0	NA	6.782	0	61.71	39.52	0	0	144.16	0
179	2016	5	Prim	21:10:00	18	65	8	0	BB	-7.071	39.8685	Zebreira	GA	Circaetus_gallicus	NA	Ad	1	A1	0	NA	2	0	0	10.92	0	0	0	0
180	2016	5	Prim	21:12:00	18	65	8	0	BB	-7.071	39.8685	Zebreira	RM	Buteo_buteo	NA	Ad	1	B1	0	NA	3	0	0	10.92	0	0	0	0
181	2016	5	Prim	21:14:00	18	65	8	0	BB	-6.9979	39.8212	Segura	PR	Falco_tinnunculus	M	Ad	1	B1	0	NA	3	0	21.91	0	62.42	0	0	0
182	2016	5	Prim	21:20:00	18	65	8	0	BB	-6.9979	39.8212	Segura	RM	Buteo_buteo	NA	Ad	1	B1	0	NA	3	0	21.91	0	62.42	0	0	0
183	2016	5	Prim	09:12:00	14	84	2	0.1	BB	-6.932	39.9692	Monfortinho	RM	Buteo_buteo	NA	Ad	1	B1	0	NA	3	0	0	34.37	0	123.3	123.3	0
184	2016	5	Prim	09:26:00	21	61	4	0	BB	-7.071	39.8685	Zebreira	BUI	Gyps_fulvus	NA	NA	1	A1	0	NA	2	0	0	10.92	0	0	0	0
185	2016	5	Prim	09:29:00	21	61	4	0	BB	-7.071	39.8685	Zebreira	PR	Falco_tinnunculus	M	Ad	1	B3	0	NA	6.782	0	0	10.92	0	0	0	0
186	2016	5	Prim	09:33:00	21	61	4	0	BB	-7.071	39.8685	Zebreira	RM	Buteo_buteo	NA	Ad	1	B1	0	NA	3	0	0	10.92	0	0	0	0
187	2016	5	Prim	09:38:00	21	61	4	0	BB	-7.135	39.721	Rosmaninhal	GA	Circaetus_gallicus	NA	Ad	1	A1	0	NA	2	0	61.71	39.52	0	0	144.16	0
188	2016	5	Prim	21:45:00	14	68	14	0	Bal	-7.318	37.9296	Vilaverde de Filcalho	PR	Falco_tinnunculus	M	Ad	1	A1	0	NA	2	0	44.65	0	0	263.38	263.38	0
189	2016	5	Prim	07:00:00	25	65	6	0	Bal	-7.806	37.614	Sao Joao dos Caldeiros	GA	Circaetus_gallicus	NA	Ad	1	Pos1	1	1	0	0	0	60.98	0	0	0	0
190	2016	5	Prim	07:15:00	25	53	13	0	Bal	-7.852	37.643	Pelinhos	GA	Circaetus_gallicus	NA	Ad	1	B1	1	0	4	0	0	0	0	110.73	110.73	0
191	2016	5	Prim	07:17:00	25	53	13	0	Bal	-7.852	37.643	Pelinhos	GA	Circaetus_gallicus	NA	Ad	1	A1	1	0	2	0	0	0	0	110.73	110.73	0
192	2016	6	Ver	10:20:00	27	40	9	0	BB	-6.9979	39.8212	Segura	BUI	Gyps_fulvus	NA	NA	1	A1	0	NA	2	1	21.91	0	62.42	0	0	0
193	2016	6	Ver	10:21:00	27	40	9	0	BB	-6.9979	39.8212	Segura	BUI	Gyps_fulvus	NA	NA	2	A1	0	NA	2	1	21.91	0	62.42	0	0	0
194	2016	6	Ver	10:21:00	27	40	9	0	BB	-6.9979	39.8212	Segura	BUI	Gyps_fulvus	NA	NA	2	B1	0	NA	5	1	21.91	0	62.42	0	0	0
195	2016	6	Ver	10:25:00	27	40	9	0	BB	-6.9979	39.8212	Segura	GA	Circaetus_gallicus	NA	Ad	1	A1	1	0	2	0	21.91	0	62.42	0	0	0
196	2016	6	Ver	09:20:00	32	39	13	0	Bal	-7.806	37.614	Sao Joao dos Caldeiros	GA	Circaetus_gallicus	NA	Inm	1	Pos1	1	1	0	0	0	0	0	0	0	0
197	2016	6	Ver	09:30:00	32	39	13	0	Bal	-7.806	37.614	Sao Joao dos Caldeiros	GA	Circaetus_gallicus	NA	Inm	1	Pos1	1	1	0	0	0	121.96	0	0	0	0
198	2016	6	Ver	17:30:00	28	25	13	0	Bal	-7.286	38.027	Sobral da Adica	RM	Buteo_buteo	NA	Ad	1	B1	0	NA	3	0	144.1	0	0	35	35	1
199	2016	6	Ver	18:02:00	29	19	10	0	Bal	-7.394	37.873	Aldea nova de Sao Bento	RM	Buteo_buteo	NA	Ad	1	B2	1	0	3	0	0	0	0	0	314.01	0
200	2016	6	Ver	19:00:00	29	20	10	0	AlCe	-7.3453	38.6246	Rosario	GA	Circaetus_gallicus	NA	Inm	1	Pos1	1	1	0	0	55.49	0	0	83.99	83.99	0
201	2016	6	Ver	19:05:00	29	20	10	0	AlCe	-7.3453	38.6246	Rosario	PR	Elanus_caeruleus	NA	Ad	1	Pos1	1	1	0	0	55.49	0	0	83.99	83.99	0
202	2016	7	Ver	09:20:00	33	47	2	0	BB	-6.932	39.9692	Monfortinho	GA	Circaetus_gallicus	NA	Ad	1	A1	0	NA	2	0	0	34.37	0	123.3	123.3	0
203	2016	7	Ver	09:28:00	33	47	3	0	BB	-6.9979	39.8212	Segura	PR	Elanus_caeruleus	NA	Ad	1	A1	0	NA	2	0	21.91	0	62.42	0	0	0
204	2016	7	Ver	09:30:00	33	47	3	0	BB	-6.9979	39.8212	Segura	RM	Buteo_buteo	NA	Ad	1	B1	0	NA	3	0	21.91	0	62.42	0	0	0
205	2016	7	Ver	09:35:00	33	47	3	0	BB	-7.071	39.8685	Zebreira	RM	Buteo_buteo	NA	Ad	1	Pos1	1	1	0	0	0	10.92	0	0	0	0
206	2016	7	Ver	09:43:00	33	47	3	0	BB	-7.135	39.721	Rosmaninhal	GA	Circaetus_gallicus	NA	Ad	1	B1	0	NA	4	0	61.71	39.52	0	0	144.16	0
207	2016	7	Ver	09:45:00	33	47	3	0	BB	-7.135	39.721	Rosmaninhal	GA	Circaetus_gallicus	NA	Ad	1	A1	0	NA	2	0	61.71	39.52	0	0	144.16	0
208	2016	7	Ver	11:28:00	37	35	9	0	AA	-6.9979	39.8212	Segura	GA	Circaetus_gallicus	NA	Ad	1	A1	0	NA	2	0	21.91	0	62.42	0	0	0
209	2016	7	Ver	08:21:00	33	46	13	0	Bal	-7.79	37.66	Alvares	GA	Circaetus_gallicus	NA	Ad	1	Pos1	1	1	0	0	11.34	0.49	27.26	119.34	119.34	1
210	2016	7	Ver	09:00:00	28	76	10	0	Bal	-7.825	37.5768	Castanhos	GA	Circaetus_gallicus	NA	Ad	1	Pos1	1	1	0	0	0	0	0	89.19	89.19	0
211	2016	7	Ver	10:45:00	35	19	8	0	BB	-7.071	39.8685	Zebreira	GA	Circaetus_gallicus	NA	Ad	1	A1	0	NA	2	0	0	10.92	0	0	0	0
212	2016	7	Ver	19:30:00	26	26	26	0	Bal	-7.394	37.873	Aldea nova de Sao Bento	PR	Elanus_caeruleus	NA	Ad	1	Pos1	1	1	0	0	0	0	0	0	314.01	0
213	2016	7	Ver	19:30:00	28	13	14	0	Bal	-7.7315	37.6097	Brites Gomes	GA	Circaetus_gallicus	NA	Ad	1	Pos1	1	1	0	0	0	19.84	0	13.79	13.79	1
214	2016	7	Ver	19:35:00	28	13	14	0	Bal	-7.7315	37.6097	Brites Gomes	GA	Circaetus_gallicus	NA	Ad	1	Pos1	1	1	0	0	0	19.84	0	13.79	13.79	1
215	2016	7	Ver	19:35:00	28	13	14	0	Bal	-7.7315	37.6097	Brites Gomes	PR	Falco_tinnunculus	M	Ad	1	B1	0	NA	3	0	0	19.84	0	13.79	13.79	1
216	2016	7	Ver	17:12:00	31	15	3	0	Bal	-7.231	38.104	Safara	RM	Buteo_buteo	NA	Ad	1	A1	0	NA	2	0	0	0	0	245.68	245.68	1
217	2016	7	Ver	11:46:00	40	16	9	0	BB	-7.135	39.721	Rosmaninhal	RM	Buteo_buteo	H	Ad	1	A1	0	NA	2	0	61.71	39.52	0	0	144.16	0
218	2016	7	Ver	12:12:00	40	16	9	0	BB	-7.071	39.8685	Zebreira	GA	Circaetus_gallicus	NA	Ad	1	A1	0	NA	2	0	0	10.92	0	0	0	0
219	2016	7	Ver	12:19:00	40	16	9	0	BB	-7.071	39.8685	Zebreira	RM	Buteo_buteo	NA	Ad	1	B1	0	NA	3	0	0	10.92	0	0	0	0
220	2016	7	Ver	12:20:00	40	16	9	0	BB	-7.071	39.8685	Zebreira	RM	Buteo_buteo	NA	Ad	1	A1	0	NA	2	0	0	10.92	0	0	0	0
221	2016	7	Ver	11:00:00	37	20	12	0	AA	-7.067	39.0172	Campo maior	GA	Circaetus_gallicus	NA	Ad	1	Pos1	1	1	0	0	0	0	0	85.41	85.41	1
222	2016	7	Ver	20:00:00	21	47	23	0	Bal	-7.7315	37.6097	Brites Gomes	PR	Falco_tinnunculus	M	Ad	1	B1	0	NA	3	0	0	19.84	0	13.79	13.79	1
223	2016	7	Ver	06:00:00	25	86	19	0	Bal	-7.394	37.873	Aldea nova de Sao Bento	RM	Buteo_buteo	NA	Ad	1	B1	1	0	3	0	0	0	0	0	314.01	0
224	2016	7	Ver	06:20:00	25	86	19	0	Bal	-7.318	37.9296	Vilaverde de Filcalho	RM	Milvusmigrans	NA	Ad	1	Pos1	1	1	0	0	44.65	0	0	263.38	263.38	0
225	2016	7	Ver	06:40:00	24	88	8	0	AlCe	-7.2556	38.301	Granja	GA	Circaetus_gallicus	NA	Ad	1	Pos1	1	1	0	0	0	0	0	87.68	87.68	1
226	2016	7	Ver	06:45:00	24	88	8	0	AlCe	-7.287	38.3639	Mourao	RM	Buteo_buteo	NA	Ad	1	B3	1	0	8.226	0	0	0	0	8.88	8.88	1
227	2016	8	Ver	09:55:00	32	36	4	0	BB	-7.071	39.8685	Zebreira	PR	Falco_tinnunculus	M	Ad	2	B1	0	NA	3	1	0	10.92	0	0	0	0
228	2016	8	Ver	09:55:00	32	36	4	0	BB	-7.071	39.8685	Zebreira	PR	Falco_tinnunculus	H	Ad	2	B1	0	NA	3	1	0	10.92	0	0	0	0
229	2016	8	Ver	10:10:00	32	36	4	0	BB	-7.071	39.8685	Zebreira	BUI	Gyps_fulvus	NA	Ad	1	B1	0	NA	5	0	0	10.92	0	0	0	0
230	2016	8	Ver	10:11:00	32	36	4	0	BB	-7.071	39.8685	Zebreira	RM	Buteo_buteo	NA	Ad	1	A1	0	NA	2	0	0	10.92	0	0	0	0
231	2016	8	Ver	10:25:00	32	36	4	0	BB	-7.071	39.8685	Zebreira	PR	Falco_tinnunculus	M	Ad	1	A1	0	NA	2	0	0	10.92	0	0	0	0
232	2016	8	Ver	11:25:00	36	22	3	0	BB	-7.071	39.8685	Zebreira	GA	Circaetus_gallicus	NA	Ad	1	A1	0	NA	2	0	0	10.92	0	0	0	0
233	2016	8	Ver	11:30:00	36	22	3	0	BB	-7.071	39.8685	Zebreira	RM	Buteo_buteo	NA	Ad	1	A1	0	NA	2	0	0	10.92	0	0	0	0
234	2016	9	Oto	08:00:00	35	22	8	0	Bal	-7.231	38.104	Safara	RM	Buteo_buteo	NA	Ad	1	A1	0	NA	2	0	0	0	0	245.68	245.68	1
235	2016	9	Oto	08:05:00	35	22	8	0	Bal	-7.231	38.104	Safara	PR	Falco_tinnunculus	M	Ad	1	B2	0	NA	3	0	0	0	0	245.68	245.68	1
236	2016	9	Oto	11:30:00	40	15	18	0	Bal	-7.231	38.104	Safara	GA	Circaetus_gallicus	NA	Ad	1	Pos1	1	1	0	0	0	0	0	245.68	245.68	1
237	2016	9	Oto	16:00:00	30	20	18	0	AlCe	-7.287	38.3639	Mourao	PR	Falco_tinnunculus	M	Ad	1	B1	1	0	3	0	0	0	0	8.88	8.88	1
238	2016	9	Oto	17:00:00	23	24	21	0	Bal	-7.5013	37.8075	Vales mortos	RM	Buteo_buteo	NA	Ad	1	B2	1	0	3	0	95.63	0	0	0	0	0
239	2016	9	Oto	17:15:00	23	24	21	0	Bal	-7.5013	37.8075	Vales mortos	RM	Buteo_buteo	NA	Ad	1	A1	1	0	2	0	95.63	0	0	0	0	0
240	2016	9	Oto	14:00:00	27	23	13	0	Bal	-7.5013	37.8075	Vales mortos	RM	Buteo_buteo	NA	Ad	1	B1	1	0	3	0	95.63	0	0	0	0	0
241	2016	9	Oto	14:40:00	27	23	13	0	Bal	-7.5013	37.8075	Vales mortos	RM	Buteo_buteo	NA	Ad	1	B2	1	0	3	0	95.63	0	0	314.01	314.01	0
242	2016	9	Oto	14:45:00	27	23	13	0	Bal	-7.5013	37.8075	Vales mortos	RM	Buteo_buteo	NA	Ad	1	B1	1	0	3	0	95.63	0	0	0	0	0
243	2016	9	Oto	17:30:00	19	25	9	0	Bal	-7.231	38.104	Safara	PR	Elanus_caeruleus	NA	Ad	1	Pos1	1	1	0	0	0	0	0	245.68	245.68	1
244	2016	9	Oto	18:00:00	19	25	9	0	AlCe	-7.287	38.3639	Mourao	RM	Buteo_buteo	NA	Ad	1	B1	1	0	3	0	0	0	0	0	0	1
245	2016	10	Oto	17:00:00	23	27	10	0	Bal	-7.394	37.873	Aldea nova de Sao Bento	RM	Buteo_buteo	NA	Ad	1	B1	1	0	3	0	0	0	0	0	322.89	0
246	2016	10	Oto	16:00:00	29	19	7	0	Bal	-7.8966	37.6361	Figueirinha	RM	Buteo_buteo	NA	Ad	1	Pos1	1	1	0	0	0	0	0	260.69	260.69	1
247	2016	10	Oto	19:00:00	26	46	11	0	Bal	-7.394	37.873	Aldea nova de Sao Bento	RM	Buteo_buteo	NA	Ad	1	B3	1	0	8.226	0	0	0	0	0	0	0
248	2016	10	Oto	19:03:00	26	46	11	0	Bal	-7.394	37.873	Aldea nova de Sao Bento	RM	Buteo_buteo	NA	Ad	1	Pos1	1	1	0	0	0	0	0	0	314.01	0
249	2016	11	Oto	10:00:00	12	64	6	0	AA	-7.44	39.052	Monforte	GA	Aquila_adalberti	H	Ad	1	Pos1	1	1	0	0	9.7	0	0	0	214.27	0
250	2016	11	Oto	10:45:00	12	64	6	0	AA	-7.44	39.052	Monforte	RM	Buteo_buteo	NA	Ad	1	Pos1	1	1	0	0	9.7	0	0	0	214.27	0
251	2016	11	Oto	11:10:00	12	64	6	0	AlCe	-7.506	38.9534	Veiros	RM	Buteo_buteo	NA	Ad	1	B1	1	0	3	0	35.44	0	0	125.66	125.66	0
252	2016	11	Oto	12:30:00	21	42	15	0	Bal	-7.6439	37.683	Corte pequenha	RM	Buteo_buteo	NA	Ad	1	B1	1	0	3	0	115.87	4.49	0	19.35	19.35	1
253	2016	11	Oto	10:30:00	21	28	17	0	Bal	-7.6439	37.683	Corte pequenha	RM	Buteo_buteo	NA	Ad	1	B3	1	0	8.226	0	115.87	4.49	0	19.35	19.35	1
254	2016	12	Inv	11:00:00	14	83	16	3	Bal	-7.69	37.62	Sapos	RM	Buteo_buteo	NA	Ad	1	Pos1	1	1	0	0	0	106.27	0	0	23.51	1
255	2016	12	Inv	12:00:00	15	71	12	0	Bal	-7.8966	37.6361	Figueirinha	PR	Falco_tinnunculus	M	Ad	1	B3	1	0	6.782	0	0	0	0	260.69	260.69	1
256	2016	12	Inv	14:50:00	15	82	15	0	AlCe	-7.2556	38.301	Granja	PR	Elanus_caeruleus	NA	Ad	1	Pos1	1	1	0	0	0	0	0	0	0	1
257	2016	12	Inv	15:20:00	15	47	6	0	Bal	-7.394	37.873	Aldea nova de Sao Bento	RM	Buteo_buteo	NA	Ad	1	B1	1	0	3	0	0	0	0	0	314.01	0
258	2016	12	Inv	15:24:00	15	47	6	0	Bal	-7.394	37.873	Aldea nova de Sao Bento	RM	Buteo_buteo	NA	Ad	1	B1	1	0	3	0	0	0	0	0	314.01	0
259	2016	12	Inv	15:29:00	15	47	6	0	Bal	-7.394	37.873	Aldea nova de Sao Bento	PR	Elanus_caeruleus	NA	Ad	1	Pos1	1	1	0	0	0	0	0	0	314.01	0
260	2017	1	Inv	08:30:00	16	86	9	0	Bal	-7.7341	37.64	Morena	GA	Aquila_fasciata	NA	Inm	1	B1	1	0	3	0	36.44	0	0	0	0	1
261	2017	1	Inv	08:30:00	16	86	9	0	Bal	-7.7341	37.64	Morena	RM	Buteo_buteo	NA	Ad	1	Pos1	1	1	0	0	36.44	0	0	0	0	1
262	2017	1	Inv	17:00:00	13	86	12	0	Bal	-7.711	37.632	Namorados	RM	Buteo_buteo	NA	Ad	1	Pos1	1	1	0	0	12.04	0	0	14.31	14.31	1
263	2017	2	Inv	09:18:00	12	92	2	0.1	BB	-6.9531	39.906	Salvaterra do extremo	PR	Elanus_caeruleus	NA	Ad	1	A1	0	NA	2	0	166.13	0	0	0	0	0
264	2017	2	Inv	09:19:00	12	92	2	0.1	BB	-6.9531	39.906	Salvaterra do extremo	PR	Elanus_caeruleus	NA	Ad	1	A1	0	NA	2	0	166.13	0	0	0	0	0
265	2017	2	Inv	09:20:00	12	92	2	0.1	BB	-6.9531	39.906	Salvaterra do extremo	RM	Buteo_buteo	NA	Ad	1	B1	0	NA	3	0	166.13	0	0	0	0	0
266	2017	2	Inv	09:23:09	12	92	2	0.1	BB	-6.9979	39.8212	Segura	RM	Buteo_buteo	NA	Ad	1	A1	0	NA	2	0	21.91	0	62.42	0	0	0
267	2017	2	Inv	09:23:09	12	92	2	0.1	BB	-6.9979	39.8212	Segura	RM	Buteo_buteo	NA	Ad	1	B1	0	NA	3	0	21.91	0	62.42	0	0	0
268	2017	2	Inv	09:30:00	12	92	2	0.1	BB	-7.071	39.8685	Zebreira	RM	Buteo_buteo	NA	Ad	1	B1	0	NA	3	0	0	10.92	0	0	0	0
269	2017	2	Inv	09:31:00	12	92	2	0.1	BB	-7.071	39.8685	Zebreira	PR	Falco_tinnunculus	M	Ad	1	A1	0	NA	2	0	0	10.92	0	0	0	0
270	2017	2	Inv	09:40:00	12	92	2	0.1	BB	-7.071	39.8685	Zebreira	RM	Buteo_buteo	NA	Ad	1	B1	0	NA	3	0	0	10.92	0	0	0	0
271	2017	2	Inv	09:41:00	12	92	2	0.1	BB	-7.071	39.8685	Zebreira	RM	Buteo_buteo	NA	Ad	1	B1	0	NA	3	0	0	10.92	0	0	0	0
272	2017	2	Inv	12:00:00	19	61	8	0	Bal	-7.394	37.873	Aldea nova de Sao Bento	RM	Buteo_buteo	NA	Ad	1	Pos1	1	1	0	0	0	0	0	0	314.01	0
273	2017	2	Inv	12:20:00	19	61	8	0	Bal	-7.394	37.873	Aldea nova de Sao Bento	RM	Buteo_buteo	NA	Ad	1	B1	1	0	3	0	0	0	0	0	314.01	0
274	2017	2	Inv	09:00:00	14	91	6	0	Bal	-7.8966	37.6361	Figueirinha	RM	Buteo_buteo	NA	Ad	1	Pos1	1	1	0	0	0	0	0	260.69	260.69	1
275	2017	2	Inv	09:05:00	14	91	6	0	Bal	-7.8966	37.6361	Figueirinha	RM	Buteo_buteo	NA	Ad	1	Pos1	1	1	0	0	0	0	0	260.69	260.69	1
276	2017	2	Inv	12:00:00	17	78	14	0.1	Bal	-7.8691	37.6472	Tacoes	PR	Falco_tinnunculus	M	Ad	1	A1	1	0	2	0	0	0	0	23.18	23.18	1
277	2017	3	Prim	11:00:00	18	62	6	0	AlCe	-7.2556	38.301	Granja	PR	Elanus_caeruleus	NA	Ad	1	Pos1	1	1	0	0	0	0	0	87.68	87.68	1
278	2017	3	Prim	10:00:00	16	81	8	0	Bal	-7.8966	37.6361	Figueirinha	RM	Buteo_buteo	NA	Ad	1	B2	1	0	3	0	0	0	0	260.69	260.69	1
279	2017	3	Prim	09:00:00	19	70	7	0	BB	-7.071	39.8685	Zebreira	RM	Buteo_buteo	NA	Ad	1	B1	0	NA	3	0	0	10.92	0	0	0	0
280	2017	3	Prim	09:30:00	17	75	8	0	AA	-7.44	39.052	Monforte	PR	Elanus_caeruleus	NA	Ad	1	Pos1	1	1	0	0	9.7	0	0	0	214.27	0
281	2017	3	Prim	12:00:00	22	59	8	0	BB	-7.135	39.721	Rosmaninhal	RM	Buteo_buteo	NA	Ad	1	B1	1	0	3	0	61.71	39.52	0	0	144.16	0
282	2017	3	Prim	15:00:00	20	54	14	0	BB	-6.932	39.9692	Monfortinho	RM	Buteo_buteo	NA	Ad	1	B2	0	NA	3	0	0	34.37	0	123.3	123.3	0
283	2017	3	Prim	09:00:00	14	74	8	0	BB	-6.932	39.9692	Monfortinho	BUI	Gyps_fulvus	NA	Ad	2	B1	0	NA	5	1	0	34.37	0	123.3	123.3	0
284	2017	3	Prim	09:00:00	14	74	8	0	BB	-6.932	39.9692	Monfortinho	BUI	Gyps_fulvus	NA	Ad	2	B2	0	NA	5	1	0	34.37	0	123.3	123.3	0
285	2017	3	Prim	09:00:00	14	74	8	0	BB	-6.932	39.9692	Monfortinho	BUI	Gyps_fulvus	NA	Ad	1	A1	0	NA	2	0	0	34.37	0	123.3	123.3	0
286	2017	3	Prim	09:20:00	14	74	8	0	BB	-6.932	39.9692	Monfortinho	BUI	Gyps_fulvus	NA	Ad	1	A1	0	NA	2	0	0	34.37	0	123.3	123.3	0
287	2017	3	Prim	12:00:00	21	48	8	0	Bal	-7.8186	37.6799	Meceares	RM	Buteo_buteo	NA	Ad	1	Pos1	1	1	0	0	0	0	0	0	0	0
288	2017	3	Prim	19:00:00	12	79	12	0.4	Bal	-7.7315	37.6097	Brites Gomes	RM	Buteo_buteo	NA	Ad	1	Pos1	1	1	0	0	0	19.84	0	13.79	13.79	1
289	2017	3	Prim	11:00:00	14	42	18	0.1	Bal	-7.7614	37.6528	Corte pao e agua	PR	Falco_tinnunculus	M	Ad	1	B1	1	0	3	0	0	20.14	0	268.77	268.77	1
290	2017	3	Prim	08:15:00	10	69	4	0	AA	-7.9544	37.6173	Sete	PR	Falco_tinnunculus	M	Ad	1	B3	1	0	6.782	0	34.89	0	0	55.76	55.76	1
291	2017	3	Prim	08:45:00	10	69	4	0	Bal	-7.8966	37.6361	Figueirinha	RM	Buteo_buteo	NA	Ad	1	Pos1	1	1	0	0	0	0	0	260.69	260.69	1
292	2017	3	Prim	08:00:00	19	66	7	0	BB	-7.071	39.8685	Zebreira	RM	Buteo_buteo	NA	Ad	1	A1	0	NA	2	0	0	10.92	0	0	0	0
293	2017	3	Prim	09:00:00	19	66	7	0	BB	-7.071	39.8685	Zebreira	PR	Falco_tinnunculus	M	Ad	1	B1	0	NA	3	0	0	10.92	0	0	0	0
294	2017	3	Prim	09:00:00	19	66	7	0	BB	-7.071	39.8685	Zebreira	PR	Falco_tinnunculus	H	Ad	1	B1	0	NA	3	0	0	10.92	0	0	0	0
295	2017	3	Prim	09:10:00	19	66	7	0	BB	-7.071	39.8685	Zebreira	PR	Falco_tinnunculus	H	Ad	1	A1	0	NA	2	0	0	10.92	0	0	0	0
296	2017	4	Prim	09:36:00	19	46	3	0	BB	-6.9531	39.906	Salvaterra do Estremo	RM	Buteo_buteo	NA	Ad	1	B1	0	NA	3	0	166.13	0	0	0	0	0
297	2017	4	Prim	09:30:00	21	58	4	0	BB	-7.071	39.8685	Zebreira	RM	Milvusmigrans	NA	Ad	1	B1	0	NA	3	0	0	10.92	0	0	0	0
298	2017	4	Prim	16:30:00	24	34	2	0	BB	-7.071	39.8685	Zebreira	PR	Falco_tinnunculus	M	Ad	1	B1	0	NA	3	0	0	10.92	0	0	0	0
299	2017	4	Prim	16:40:00	24	34	2	0	BB	-7.071	39.8685	Zebreira	RM	Hieraaetus_pennatus	NA	Ad	1	B1	0	NA	3	0	0	10.92	0	0	0	0
300	2017	4	Prim	17:00:00	19	52	4	0	BB	-7.071	39.8685	Zebreira	RM	Milvusmigrans	NA	Ad	1	A1	0	NA	2	0	0	10.92	0	0	0	0
301	2017	4	Prim	20:15:00	16	62	12	0.1	Bal	-7.7315	37.6097	Brites Gomes	GA	Circaetus_gallicus	NA	Inm	1	Pos1	1	1	0	0	0	19.84	0	13.79	13.79	1
302	2017	5	Prim	08:43:00	14	52	3	0	BB	-7.071	39.8685	Zebreira	RM	Buteo_buteo	M	Ad	1	B2	0	NA	3	0	0	10.92	0	0	0	0
303	2017	5	Prim	16:30:00	22	31	4	0	AlCe	-7.2556	38.301	Granja	RM	Buteo_buteo	NA	Ad	1	Pos1	1	1	0	0	0	0	0	87.68	87.68	1
304	2017	5	Prim	17:00:00	17	34	7	0	Bal	-7.318	37.9296	Vilaverde de Filcalho	RM	Buteo_buteo	NA	Ad	1	B1	1	0	3	0	44.65	0	0	263.38	263.38	0
305	2017	5	Prim	07:00:00	23	66	9	0	Bal	-7.711	37.632	Namorados	GA	Circaetus_gallicus	NA	NA	1	Pos1	1	1	0	0	12.04	0	0	0	0	1
306	2017	5	Prim	09:30:00	23	66	9	0	Bal	-7.8078	37.6323	Romeiras	RM	Buteo_buteo	NA	Ad	1	A1	1	0	2	0	0	100.07	0	0	203.5	0
307	2017	5	Prim	18:00:00	21	26	13	0	Bal	-7.7315	37.6097	Brites Gomes	GA	Circaetus_gallicus	NA	Inm	1	Pos1	1	1	0	0	0	19.84	0	13.79	13.79	1
308	2017	5	Prim	19:45:00	16	63	12	0	Bal	-7.7315	37.6097	Brites Gomes	GA	Circaetus_gallicus	NA	Inm	1	Pos1	1	1	0	0	0	19.84	0	13.79	13.79	1
309	2017	5	Prim	10:16:00	18	68	21	1.1	Bal	-7.394	37.873	Aldea nova de Sao Bento	RM	Buteo_buteo	M	Ad	1	B1	1	0	3	0	0	0	0	0	314.01	0
310	2017	11	Oto	18:00:00	14	64	18	0.5	BB	-7.071	39.8685	Zebreira	PR	Elanus_caeruleus	NA	Ad	1	B1	0	NA	3	0	0	10.92	0	0	0	0
311	2017	11	Oto	18:01:00	14	64	18	0.5	BB	-7.071	39.8685	Zebreira	PR	Falco_tinnunculus	M	Ad	1	B1	0	NA	3	0	0	10.92	0	0	0	0
312	2017	11	Oto	21:30:00	13	66	14	0	BB	-7.071	39.8685	Zebreira	GA	Circaetus_gallicus	NA	Ad	1	A1	0	NA	2	0	0	10.92	0	0	0	0
313	2017	5	Prim	08:50:00	15	85	5	0.1	BB	-7.071	39.8685	Zebreira	PR	Falco_tinnunculus	M	Ad	1	B1	0	NA	3	0	0	10.92	0	0	0	0
314	2017	5	Prim	08:56:00	15	85	5	0.1	BB	-7.071	39.8685	Zebreira	GA	Circaetus_gallicus	NA	Ad	1	B1	0	NA	4	0	0	10.92	0	0	0	0
315	2017	5	Prim	08:59:00	15	85	5	0.1	BB	-7.071	39.8685	Zebreira	GA	Circaetus_gallicus	NA	Inm	1	Pos1	1	1	0	0	0	10.92	0	0	0	0
316	2017	5	Prim	08:59:00	15	85	5	0.1	BB	-7.071	39.8685	Zebreira	RM	Buteo_buteo	M	Ad	1	Pos1	1	1	0	0	0	10.92	0	0	0	0
317	2017	5	Prim	15:51:00	26	29	4	0	AlCe	-7.287	38.3639	Mourao	RM	Buteo_buteo	M	Ad	1	B1	1	0	3	0	0	0	0	8.88	8.88	1
318	2017	5	Prim	15:54:00	26	29	4	0	AlCe	-7.287	38.3639	Mourao	PR	Falco_tinnunculus	M	Ad	1	B2	0	NA	3	0	0	0	0	8.88	8.88	1
319	2017	5	Prim	17:40:00	22	23	8	0	Bal	-7.66	37.641	Mertola	PR	Falco_tinnunculus	M	Ad	1	B2	0	NA	3	0	89.41	73.72	0	24.99	24.99	1
320	2017	5	Prim	07:54:00	27	60	6	0	Bal	-7.66	37.641	Mertola	GA	Circaetus_gallicus	NA	Ad	1	Pos1	1	1	0	0	89.41	73.72	0	24.99	24.99	1
321	2017	5	Prim	18:43:00	20	39	3	0	BB	-7.071	39.8685	Zebreira	PR	Elanus_caeruleus	NA	Ad	1	A1	1	0	2	0	0	10.92	0	0	0	0
322	2017	5	Prim	18:43:00	20	39	3	0	BB	-7.071	39.8685	Zebreira	PR	Falco_tinnunculus	M	Ad	1	A1	1	0	2	0	0	10.92	0	0	0	0
323	2017	5	Prim	19:00:00	20	39	6	0	AA	-7.44	39.052	Monforte	GA	Circaetus_gallicus	NA	Ad	1	Pos1	1	1	0	0	9.7	0	0	0	214.27	0
324	2017	5	Prim	09:46:00	27	45	11	0	AlCe	-7.287	38.3639	Mourao	PR	Falco_tinnunculus	M	Ad	1	B1	1	0	3	0	0	0	0	8.88	8.88	1
325	2017	5	Prim	09:46:00	27	45	11	0	AlCe	-7.287	38.3639	Mourao	PR	Falco_tinnunculus	M	Ad	1	B2	1	0	3	0	0	0	0	8.88	8.88	1
326	2017	5	Prim	10:00:00	27	45	11	0	AlCe	-7.287	38.3639	Mourao	PR	Falco_tinnunculus	M	Ad	1	B2	1	0	3	0	0	0	0	0	0	1
327	2017	5	Prim	11:00:00	32	29	12	0	Bal	-7.394	37.873	Aldea nova de Sao Bento	RM	Buteo_buteo	NA	Ad	1	Pos1	1	1	0	0	0	0	0	0	322.89	0
328	2017	5	Prim	19:00:00	24	25	14	0	Bal	-7.806	37.614	Sao Joao dos Caldeiros	GA	Circaetus_gallicus	NA	Inm	1	Pos1	1	1	0	0	0	60.98	0	0	0	0
329	2017	5	Prim	06:30:00	23	77	4	0.6	Bal	-7.711	37.632	Namorados	GA	Circaetus_gallicus	NA	Ad	1	Pos1	1	1	0	0	12.04	0	0	14.31	14.31	1
330	2017	5	Prim	09:30:00	28	58	8	0.3	Bal	-7.8966	37.6361	Figueirinha	RM	Buteo_buteo	NA	Ad	1	Pos1	1	1	0	0	0	0	0	260.69	260.69	1
331	2017	5	Prim	14:55:00	30	24	9	0	Bal	-7.8966	37.6361	Figueirinha	RM	Buteo_buteo	NA	Ad	1	B1	1	0	3	0	0	0	0	260.69	260.69	1
332	2017	5	Prim	15:00:00	30	24	9	0	Bal	-7.8966	37.6361	Figueirinha	GA	Circaetus_gallicus	NA	Inm	1	B1	1	0	4	0	0	0	0	260.69	260.69	1
333	2017	5	Prim	18:24:00	24	23	15	0	Bal	-7.394	37.873	Aldea nova de Sao Bento	RM	Buteo_buteo	NA	Ad	1	B2	1	0	3	0	0	0	0	0	314.01	0
334	2017	5	Prim	18:50:00	25	29	13	0	BB	-7.071	39.8685	Zebreira	PR	Falco_tinnunculus	M	Ad	1	B1	0	NA	3	0	0	10.92	0	0	0	0
335	2017	5	Prim	07:57:00	20	85	9	0.2	BB	-7.071	39.8685	Zebreira	GA	Circaetus_gallicus	NA	Ad	1	A1	0	NA	2	0	0	10.92	0	0	0	0
336	2017	5	Prim	10:26:00	2	64	14	0.1	AA	-7.44	39.052	Monforte	RM	Buteo_buteo	NA	Ad	1	Pos1	1	1	0	0	9.7	0	0	0	214.27	0
337	2017	5	Prim	10:28:00	2	64	14	0.1	AA	-7.44	39.052	Monforte	GA	Circaetus_gallicus	NA	Ad	1	B1	0	NA	4	0	9.7	0	0	0	214.27	0
338	2017	5	Prim	17:25:00	19	42	15	0	BB	-7.071	39.8685	Zebreira	PR	Falco_tinnunculus	M	Ad	1	A1	1	0	2	0	0	10.92	0	0	0	0
339	2017	5	Prim	08:30:00	23	70	5	0	BB	-6.9531	39.906	Salvaterra do Extremo	RM	Buteo_buteo	NA	Ad	1	B1	0	NA	3	0	166.13	0	0	0	0	0
340	2017	5	Prim	08:38:00	23	70	5	0	BB	-7.071	39.8685	Zebreira	RM	Buteo_buteo	NA	Ad	1	Pos1	1	1	0	0	0	10.92	0	0	0	0
341	2017	5	Prim	14:50:00	16	55	13		Bal	-7.5254	37.7212	Alfrivida	RM	Buteo_buteo	NA	Ad	1	A1	0	NA	2	0	278.23	0	0	0	0	1
342	2017	5	Prim	15:34:00	22	39	6		AA	-7.659	39.197	Alter de Chao	RM	Buteo_buteo	NA	Ad	1	A1	0	NA	2	0	4.4	0	0	133.99	133.99	0
343	2017	5	Prim	15:35:00	22	39	6		AA	-7.659	39.197	Alter de Chao	RM	Buteo_buteo	NA	Ad	1	B1	0	NA	3	0	4.4	0	0	133.99	133.99	0
344	2017	5	Prim	19:08:00	19	33	24	0	AlCe	-7.91	38.5724	Evora	RM	Buteo_buteo	NA	Ad	1	B1	0	NA	3	0	0	0	0	0	0	0
345	2017	5	Prim	19:20:00	19	33	24	0	AlCe	-7.91	38.5724	Evora	RM	Buteo_buteo	NA	Ad	1	B1	0	NA	3	0	0	0	0	0	0	0
346	2017	5	Prim	19:30:00	23	24	13	0	Bal	-7.394	37.873	Aldea nova de Sao Bento	PR	Falco_tinnunculus	M	Ad	1	B1	1	0	3	0	0	0	0	0	314.01	0
347	2017	5	Prim	19:32:00	23	24	13	0	Bal	-7.394	37.873	Aldea nova de Sao Bento	RM	Buteo_buteo	NA	Ad	1	A1	1	0	2	0	0	0	0	0	314.01	0
348	2017	5	Prim	19:35:00	23	24	13	0	Bal	-7.394	37.873	Aldea nova de Sao Bento	RM	Buteo_buteo	NA	Ad	1	A1	1	0	2	0	0	0	0	0	314.01	0
349	2017	6	Ver	19:00:00	19	43	24	0	BB	-7.2754	39.8451	Ladoeiro	RM	Buteo_buteo	NA	Ad	1	A1	0	NA	2	0	0	0	0	74.26	74.26	0
350	2017	6	Ver	20:05:00	19	43	24	0	BB	-7.2754	39.8451	Ladoeiro	GA	Aquila_adalberti	M	Inm	1	A1	0	NA	2	0	0	0	0	74.26	74.26	0
351	2017	6	Ver	20:20:00	19	43	24	0	BB	-7.2754	39.8451	Ladoeiro	RM	Buteo_buteo	NA	Ad	1	A1	0	NA	2	0	0	0	0	74.26	74.26	0
352	2017	6	Ver	20:23:00	19	43	24	0	BB	-7.2754	39.8451	Ladoeiro	RM	Buteo_buteo	NA	Ad	1	B1	0	NA	3	0	0	0	0	74.26	74.26	0
353	2017	6	Oto	20:00:00	14	57	18	0	Bal	-7.8386	37.538	Sao Miguel do Pinheiro	GA	Circaetus_gallicus	NA	Ad	1	A1	0	NA	2	0	0	0	0	38.93	38.93	0
354	2017	6	Ver	16:00:00	30	22	3	0	BB	-7.135	39.721	Rosmaninhal	GA	Circaetus_gallicus	NA	Ad	1	A1	0	NA	2	0	61.71	39.52	0	0	144.16	0
355	2017	6	Ver	19:20:00	24	23	10	0	AA	-7.44	39.052	Monforte	GA	Circaetus_gallicus	NA	Ad	1	A1	0	NA	2	0	9.7	0	0	0	214.27	0
356	2017	6	Ver	19:43:00	25	26	12	0	BB	-7.2754	39.8451	Ladoeiro	GA	Circaetus_gallicus	NA	Ad	1	B2	0	NA	4	0	0	0	0	74.26	74.26	0
357	2017	6	Ver	19:45:00	25	26	12	0	BB	-7.2754	39.8451	Ladoeiro	PR	Falco_tinnunculus	M	Ad	1	B2	0	NA	3	0	0	0	0	74.26	74.26	0
358	2017	6	Ver	08:15:00	30	52	5	0	BB	-7.071	39.8685	Zebreira	RM	Buteo_buteo	M	Ad	1	B1	0	NA	3	0	0	10.92	0	0	0	0
359	2017	6	Ver	10:30:00	30	52	5	0	BB	-7.071	39.8685	Zebreira	PR	Falco_tinnunculus	H	Ad	1	B1	0	NA	3	0	0	10.92	0	0	0	0
360	2017	6	Ver	11:45:00	33	36	8	0	BB	-7.071	39.8685	Zebreira	RM	Buteo_buteo	M	Ad	1	B1	0	NA	3	0	0	10.92	0	0	0	0
361	2017	6	Ver	07:00:00	25	77	5	0	BB	-7.135	39.721	Rosmaninhal	PR	Elanus_caeruleus	NA	Ad	1	A1	0	NA	2	0	61.71	39.52	0	0	144.16	0
362	2017	6	Ver	11:30:00	33	34	4	0	AA	-7.44	39.052	Monforte	GA	Circaetus_gallicus	NA	Ad	1	B1	0	NA	4	0	9.7	0	0	0	214.27	0
363	2017	6	Ver	11:40:00	33	34	4	0	AA	-7.44	39.052	Monforte	GA	Circaetus_gallicus	NA	Ad	1	A1	0	NA	2	0	9.7	0	0	0	214.27	0
364	2017	6	Ver	12:00:00	33	37	3	0	BB	-7.2754	39.8451	Ladoeiro	BUI	Gyps_fulvus	NA	Ad	1	A1	0	NA	2	0	0	0	0	74.26	74.26	0
365	2017	6	Ver	12:01:00	33	37	3	0	BB	-7.2754	39.8451	Ladoeiro	BUI	Gyps_fulvus	NA	Ad	1	A1	0	NA	2	0	0	0	0	74.26	74.26	0
366	2017	6	Ver	14:00:00	33	17	9	0.1	AA	-7.44	39.052	Monforte	GA	Circaetus_gallicus	NA	Ad	1	B1	0	NA	4	0	9.7	0	0	0	214.27	0
367	2017	6	Ver	15:55:00	33	17	9	0.1	AA	-7.44	39.052	Monforte	GA	Circaetus_gallicus	NA	Ad	1	A1	0	NA	2	0	9.7	0	0	0	214.27	0
368	2017	6	Ver	18:00:00	30	18	8	0	BB	-7.071	39.8685	Zebreira	GA	Aquila_adalberti	H	Ad	1	B2	0	NA	4	0	0	10.92	0	0	0	0
369	2017	7	Ver	09:37:00	25	36	24	0	BB	-7.071	39.8685	Zebreira	RM	Buteo_buteo	NA	Ad	1	A1	0	NA	2	0	0	10.92	0	0	0	0
370	2017	7	Ver	09:00:00	33	28	15	0	BB	-7.071	39.8685	Zebreira	BUI	Gyps_fulvus	NA	Ad	1	A1	0	NA	2	0	0	10.92	0	0	0	0
371	2017	7	Ver	08:30:00	25	60	9	0	BB	-6.9979	39.8212	Segura	RM	Buteo_buteo	NA	Ad	1	B1	0	NA	3	0	21.91	0	62.42	0	0	0
372	2017	7	Ver	08:45:00	25	60	9	0	BB	-7.071	39.8685	Zebreira	RM	Buteo_buteo	NA	Ad	1	A1	0	NA	2	0	0	10.92	0	0	0	0
373	2017	7	Ver	09:00:00	25	60	9	0	BB	-7.071	39.8685	Zebreira	RM	Buteo_buteo	NA	Ad	1	A1	0	NA	2	0	0	10.92	0	0	0	0
374	2017	7	Ver	09:15:00	25	60	9	0	BB	-7.135	39.721	Rosmaninhal	RM	Buteo_buteo	NA	Ad	2	A1	0	NA	2	1	61.71	39.52	0	0	144.16	0
375	2017	7	Ver	09:15:00	25	60	9	0	BB	-7.135	39.721	Rosmaninhal	RM	Buteo_buteo	NA	Ad	2	A1	0	NA	2	1	61.71	39.52	0	0	144.16	0
376	2017	7	Ver	09:00:00	29	53	5	0	BB	-7.071	39.8685	Zebreira	PR	Falco_tinnunculus	H	Ad	1	A1	0	NA	2	0	0	10.92	0	0	0	0
377	2017	7	Ver	09:10:00	29	53	5	0	BB	-7.071	39.8685	Zebreira	RM	Buteo_buteo	M	Ad	1	B1	0	NA	3	0	0	10.92	0	0	0	0
378	2017	7	Ver	14:10:00	30	27	21	0	BB	-7.2754	39.8451	Ladoeiro	GA	Circaetus_gallicus	NA	Ad	1	A1	0	NA	2	0	0	0	0	74.26	74.26	0
379	2017	7	Ver	09:04:00	31	42	4	0	BB	-7.135	39.721	Rosmaninhal	PR	Elanus_caeruleus	NA	Ad	1	Pos1	1	1	0	0	61.71	39.52	0	0	144.16	0
380	2017	7	Ver	10:40:00	34	32	5	0	AlCe	-7.506	38.9534	Veiros	RM	Buteo_buteo	NA	Ad	1	A1	0	NA	2	0	35.44	0	0	125.66	125.66	0
381	2017	7	Ver	09:30:00	34	28	6	0	BB	-6.932	39.9692	Monfortinho	RM	Buteo_buteo	NA	Ad	1	B1	0	NA	3	0	0	34.37	0	123.3	123.3	0
382	2017	7	Ver	09:30:00	34	28	6	0	BB	-7.071	39.8685	Zebreira	RM	Buteo_buteo	NA	Ad	1	B1	0	NA	3	0	0	10.92	0	0	0	0
383	2017	7	Ver	15:15:00	33	21	7	0	AA	-7.44	39.052	Monforte	GA	Circaetus_gallicus	NA	Inm	1	B1	0	NA	4	0	9.7	0	0	0	214.27	0
384	2017	7	Ver	09:45:00	27	56	10	0	BB	-7.071	39.8685	Zebreira	GA	Circaetus_gallicus	NA	Inm	1	B2	0	NA	4	0	0	10.92	0	0	0	0
385	2017	7	Ver	09:45:00	28	41	5	0	BB	-7.071	39.8685	Zebreira	RM	Buteo_buteo	NA	Ad	1	B2	0	NA	3	0	0	10.92	0	0	0	0
386	2017	7	Ver	15:45:00	30	21	12	0	AA	-7.44	39.052	Monforte	GA	Circaetus_gallicus	NA	Ad	1	A1	0	NA	2	0	9.7	0	0	0	214.27	0
387	2017	7	Ver	16:20:00	30	20	15	0	BB	-6.932	39.9692	Monfortinho	GA	Circaetus_gallicus	NA	Ad	1	A1	0	NA	2	0	0	34.37	0	123.3	123.3	0
388	2017	7	Ver	09:12:00	32	66	6	0	BB	-6.932	39.9692	Monfortinho	PR	Elanus_caeruleus	NA	Ad	1	A1	0	NA	2	0	0	34.37	0	123.3	123.3	0
389	2017	7	Ver	09:13:00	32	66	6	0	BB	-6.932	39.9692	Monfortinho	GA	Circaetus_gallicus	NA	Ad	1	A1	0	NA	2	0	0	34.37	0	123.3	123.3	0
390	2017	7	Ver	09:15:00	32	66	6	0	BB	-6.932	39.9692	Monfortinho	PR	Elanus_caeruleus	NA	Ad	1	A1	0	NA	2	0	0	34.37	0	123.3	123.3	0
391	2017	7	Ver	09:17:00	32	66	6	0	BB	-6.932	39.9692	Monfortinho	RM	Buteo_buteo	NA	Ad	1	B1	0	NA	3	0	0	34.37	0	123.3	123.3	0
392	2017	7	Ver	13:42:00	36	20	6	0	BB	-6.9979	39.8212	Segura	PR	Falco_tinnunculus	H	Ad	1	B1	0	NA	3	0	21.91	0	62.42	0	0	0
393	2017	7	Ver	09:33:00	33	35	12	0	BB	-6.932	39.9692	Monfortinho	GA	Circaetus_gallicus	NA	Ad	1	A1	0	NA	2	0	0	34.37	0	123.3	123.3	0
394	2017	7	Ver	09:45:00	33	35	12	0	BB	-7.071	39.8685	Zebreira	PR	Falco_tinnunculus	H	Ad	1	B2	0	NA	3	0	0	10.92	0	0	0	0
395	2017	7	Ver	17:30:00	30	15	16	0	AlCe	-7.2556	38.301	Granja	RM	Buteo_buteo	NA	Ad	1	A1	1	0	2	0	0	0	0	87.68	87.68	1
396	2017	7	Ver	12:15:00	32	33	11	0	Bal	-7.8966	37.6361	Figueirinha	PR	Falco_tinnunculus	H	Ad	1	B1	1	0	3	0	0	0	0	260.69	260.69	1
397	2017	7	Ver	12:16:00	32	33	11	0	Bal	-7.8966	37.6361	Figueirinha	PR	Falco_tinnunculus	H	Ad	1	B2	1	0	3	0	0	0	0	260.69	260.69	1
398	2017	7	Ver	16:20:00	37	11	9	0	Bal	-7.394	37.873	Aldea nova de Sao Bento	RM	Buteo_buteo	NA	Ad	1	B1	1	0	3	0	0	0	0	0	314.01	0
399	2017	7	Ver	16:55:00	37	11	12	0	Bal	-7.231	38.104	Safara	RM	Buteo_buteo	NA	Ad	1	B1	1	0	3	0	0	0	0	245.68	245.68	1
400	2017	7	Ver	11:44:00	38	10	7	0	BB	-7.135	39.721	Rosmaninhal	GA	Circaetus_gallicus	NA	Ad	1	Pos1	1	1	0	0	61.71	39.52	0	0	144.16	0
401	2017	7	Ver	19:28:00	29	24	19	0	BB	-7.135	39.721	Rosmaninhal	PR	Elanus_caeruleus	NA	Ad	1	A1	0	NA	2	0	61.71	39.52	0	0	144.16	0
402	2017	7	Ver	13:07:00	36	29	7	0	AA	-7.44	39.052	Monforte	GA	Circaetus_gallicus	NA	Ad	1	Pos1	1	1	0	0	9.7	0	0	0	214.27	0
403	2017	7	Ver	09:06:00	27	34	5	0	BB	-6.932	39.9692	Monfortinho	PR	Elanus_caeruleus	NA	Ad	1	A1	0	NA	2	0	0	34.37	0	123.3	123.3	0
404	2017	7	Ver	09:16:00	27	34	5	0	BB	-7.071	39.8685	Zebreira	RM	Buteo_buteo	NA	Ad	1	B2	0	NA	3	0	0	10.92	0	0	0	0
405	2017	7	Ver	09:20:00	27	34	5	0	BB	-7.071	39.8685	Zebreira	PR	Elanus_caeruleus	NA	Ad	1	A1	0	NA	2	0	0	10.92	0	0	0	0
406	2017	8	Ver	14:30:00	32	11	10	0	Bal	-7.394	37.873	Aldea nova de Sao Bento	GA	Circaetus_gallicus	NA	Ad	1	Pos1	1	1	0	0	0	0	0	0	314.01	0
407	2017	8	Ver	15:38:00	33	14	11	0	AlCe	-7.287	38.3639	Mourao	RM	Buteo_buteo	NA	Ad	1	B2	1	0	3	0	0	0	0	8.88	8.88	1
408	2017	8	Ver	19:41:00	27	17	13	0	BB	-6.9979	39.8212	Segura	PR	Falco_tinnunculus	H	Ad	1	B2	1	0	3	0	21.91	0	62.42	0	0	0
409	2017	8	Ver	21:20:00	22	32	10	0	AA	-7.44	39.052	Monforte	GA	Circaetus_gallicus	NA	Ad	1	B1	0	NA	4	0	9.7	0	0	0	214.27	0
410	2017	8	Ver	21:32:00	22	41	10	0	BB	-7.2754	39.8451	Ladoeiro	GA	Circaetus_gallicus	NA	Ad	1	B1	1	0	4	0	0	0	0	74.26	74.26	0
411	2017	8	Ver	21:34:00	22	41	10	0	BB	-7.2754	39.8451	Ladoeiro	PR	Falco_tinnunculus	M	Ad	1	B2	1	0	3	0	0	0	0	74.26	74.26	0
412	2017	8	Ver	21:41:00	22	41	10	0	BB	-7.071	39.8685	Zebreira	GA	Circaetus_gallicus	NA	Ad	1	B1	0	NA	4	0	0	10.92	0	0	0	0
413	2017	8	Ver	21:50:00	22	41	10	0	BB	-7.071	39.8685	Zebreira	GA	Circaetus_gallicus	NA	Ad	1	A1	0	NA	2	0	0	10.92	0	0	0	0
414	2017	8	Ver	10:19:00	35	48	7	0	AA	-7.44	39.052	Monforte	GA	Circaetus_gallicus	NA	Inm	1	Pos1	1	1	0	0	9.7	0	0	0	214.27	0
415	2017	8	Ver	21:40:00	19	41	13	0	AA	-7.44	39.052	Monforte	GA	Circaetus_gallicus	NA	NA	1	B1	0	NA	4	0	9.7	0	0	0	214.27	0
416	2017	8	Ver	09:12:00	28	29	15	0	BB	-6.9979	39.8212	Segura	BUI	Gyps_fulvus	NA	NA	1	A1	0	NA	2	0	21.91	0	62.42	0	0	0
417	2017	8	Ver	09:19:00	28	29	15	0	BB	-7.071	39.8685	Zebreira	RM	Buteo_buteo	NA	NA	1	A1	0	NA	2	0	0	10.92	0	0	0	0
418	2017	8	Ver	09:30:00	28	34	14	0	AA	-7.44	39.052	Monforte	GA	Circaetus_gallicus	NA	Ad	1	Pos1	1	1	0	0	9.7	0	0	0	214.27	0
419	2017	8	Ver	11:10:00	33	16	13	0	BB	-7.135	39.721	Rosmaninhal	GA	Aquila_adalberti	H	Ad	1	B1	0	NA	4	0	61.71	39.52	0	0	144.16	0
420	2017	8	Ver	20:00:00	20	22	11	0	BB	-7.135	39.721	Rosmaninhal	GA	Circaetus_gallicus	NA	Ad	1	Pos1	1	1	0	0	61.71	39.52	0	0	144.16	0
421	2017	8	Ver	21:30:00	20	22	11	0	BB	-7.2754	39.8451	Ladoeiro	GA	Circaetus_gallicus	NA	Ad	1	B1	0	NA	4	0	0	0	0	74.26	74.26	0
422	2017	8	Ver	19:40:00	31	11	3	0	BB	-7.135	39.721	Rosmaninhal	PR	Elanus_caeruleus	NA	Ad	1	A1	0	NA	2	0	61.71	39.52	0	0	144.16	0
423	2017	8	Ver	11:00:00	39	21	4	0	BB	-6.9979	39.8212	Segura	GA	Circaetus_gallicus	NA	Ad	1	A1	0	NA	2	0	21.91	0	62.42	0	0	0
424	2017	8	Ver	11:30:00	38	25	7	0	AA	-7.44	39.052	Monforte	GA	Circaetus_gallicus	NA	Ad	1	Pos1	1	1	0	0	9.7	0	0	0	214.27	0
425	2017	8	Ver	11:33:00	38	25	7	0	AA	-7.44	39.052	Monforte	RM	Buteo_buteo	NA	Ad	1	A1	0	NA	2	0	9.7	0	0	0	214.27	0
426	2017	8	Ver	14:00:00	36	18	7	0	AA	-7.44	39.052	Monforte	GA	Circaetus_gallicus	NA	Ad	1	Pos1	1	1	0	0	9.7	0	0	0	214.27	0
427	2017	8	Ver	11:24:00	39	21	8	0	BB	-7.071	39.8685	Zebreira	GA	Circaetus_gallicus	NA	Ad	1	A1	0	NA	2	0	0	10.92	0	0	0	0
428	2017	8	Ver	11:24:00	39	21	8	0	BB	-7.071	39.8685	Zebreira	GA	Aquila_adalberti	NA	Juv	1	B2	0	NA	4	0	0	10.92	0	0	0	0
429	2017	8	Ver	11:30:00	39	21	8	0	BB	-7.071	39.8685	Zebreira	RM	Buteo_buteo	M	Ad	1	B2	0	NA	3	0	0	10.92	0	0	0	0
430	2017	8	Ver	11:44:00	39	21	8	0	BB	-7.2754	39.8451	Ladoeiro	RM	Buteo_buteo	NA	Ad	1	B2	0	NA	3	0	0	0	0	74.26	74.26	0
431	2017	8	Ver	13:30:00	39	21	8	0	BB	-7.2754	39.8451	Ladoeiro	GA	Circaetus_gallicus	NA	Inm	1	Pos1	1	1	0	0	0	0	0	74.26	74.26	0
432	2017	8	Ver	18:40:00	29	19	11	0	BB	-7.2754	39.8451	Ladoeiro	PR	Falco_tinnunculus	M	Ad	1	B2	0	NA	3	0	0	0	0	74.26	74.26	0
433	2017	8	Ver	18:43:00	29	19	11	0	BB	-7.2754	39.8451	Ladoeiro	PR	Falco_tinnunculus	M	Ad	1	B2	0	NA	3	0	0	0	0	74.26	74.26	0
434	2017	8	Ver	18:50:00	29	19	11	0	BB	-7.071	39.8685	Zebreira	RM	Buteo_buteo	NA	Ad	1	A1	0	NA	2	0	0	10.92	0	0	0	0
435	2017	8	Ver	18:57:00	29	19	11	0	BB	-7.071	39.8685	Zebreira	GA	Circaetus_gallicus	NA	Ad	1	A1	0	NA	2	0	0	10.92	0	0	0	0
436	2017	8	Ver	13:30:00	29	38	10	0	AA	-6.9979	39.8212	Segura	GA	Circaetus_gallicus	NA	Ad	1	A1	0	NA	2	0	21.91	0	62.42	0	0	0
437	2017	8	Ver	19:50:00	22	48	15	0.1	Bal	-7.394	37.873	Aldea nova de Sao Bento	RM	Buteo_buteo	NA	Ad	1	Pos1	1	1	0	0	0	0	0	0	314.01	0
438	2017	8	Ver	19:40:00	20	66	19	0	Bal	-7.394	37.873	Aldea nova de Sao Bento	RM	Buteo_buteo	NA	Ad	1	Pos1	1	1	0	0	0	0	0	0	314.01	0
439	2017	9	Oto	17:30:00	26	17	2	0	BB	-6.9979	39.8212	Segura	GA	Circaetus_gallicus	NA	Ad	1	B1	0	NA	4	0	21.91	0	62.42	0	0	0
440	2017	9	Oto	17:50:00	26	17	2	0	BB	-7.135	39.721	Rosmaninhal	GA	Circaetus_gallicus	NA	Ad	1	B1	0	NA	4	0	61.71	39.52	0	0	144.16	0
441	2017	9	Oto	19:15:00	26	16	6	0	AA	-7.44	39.052	Monforte	PR	Falco_tinnunculus	M	Ad	1	B2	0	NA	3	0	9.7	0	0	0	214.27	0
442	2017	9	Oto	19:35:00	26	17	2	0	BB	-6.9979	39.8212	Segura	GA	Circaetus_gallicus	NA	Ad	1	A1	0	NA	2	0	21.91	0	62.42	0	0	0
443	2017	9	Oto	19:36:00	26	17	2	0	BB	-6.9979	39.8212	Segura	RM	Buteo_buteo	NA	Ad	1	B2	0	NA	3	0	21.91	0	62.42	0	0	0
444	2017	9	Oto	19:36:00	26	17	2	0	BB	-6.9979	39.8212	Segura	GA	Circaetus_gallicus	NA	Ad	1	A1	0	NA	2	0	21.91	0	62.42	0	0	0
445	2017	9	Oto	19:36:00	26	17	2	0	BB	-6.9979	39.8212	Segura	RM	Buteo_buteo	NA	Ad	1	B2	0	NA	3	0	21.91	0	62.42	0	0	0
446	2017	9	Oto	11:00:00	35	28	3	0	BB	-7.071	39.8685	Zebreira	RM	Buteo_buteo	NA	Ad	1	B2	0	NA	3	0	0	10.92	0	0	0	0
447	2017	9	Oto	11:00:00	35	28	3	0	BB	-7.071	39.8685	Zebreira	RM	Buteo_buteo	NA	Ad	1	A1	0	NA	2	0	0	10.92	0	0	0	0
448	2017	9	Oto	09:30:00	23	55	10	0	BB	-6.932	39.9692	Monfortinho	GA	Circaetus_gallicus	NA	Ad	1	A1	0	NA	2	0	0	34.37	0	123.3	123.3	0
449	2017	9	Oto	09:34:00	23	55	10	0	BB	-6.9979	39.8212	Segura	GA	Circaetus_gallicus	NA	Ad	1	A1	0	NA	2	0	21.91	0	62.42	0	0	0
450	2017	9	Oto	09:53:00	23	55	10	0	BB	-7.2754	39.8451	Ladoeiro	RM	Buteo_buteo	NA	Ad	1	B3	1	0	8.226	0	0	0	0	74.26	74.26	0
451	2017	9	Oto	09:24:00	27	40	8	0	BB	-6.932	39.9692	Monfortinho	PR	Elanus_caeruleus	NA	Ad	1	Pos1	1	1	0	0	0	34.37	0	123.3	123.3	0
452	2017	9	Oto	09:30:00	27	40	8	0	BB	-6.9979	39.8212	Segura	BUI	Gyps_fulvus	NA	Ad	1	A1	0	NA	2	0	21.91	0	62.42	0	0	0
453	2017	9	Oto	14:45:00	30	20	14	0	AA	-7.21	38.95	Sao Vicente	PR	Falco_tinnunculus	M	Ad	1	Pos1	1	1	0	0	0	0	0	81.5	81.5	0
454	2017	9	Oto	20:00:00	21	31	5	0	AlCe	-7.287	38.3639	Mourao	RM	Buteo_buteo	NA	Ad	1	A1	1	0	2	0	0	0	0	8.88	8.88	1
455	2017	9	Oto	14:00:00	24	19	18	0	AlCe	-7.287	38.3639	Mourao	RM	Buteo_buteo	NA	Ad	1	Pos2	1	1	1	0	0	0	0	8.88	8.88	1
456	2017	9	Oto	09:50:00	22	37	3	0	AlCe	-7.5894	38.8428	Estremoz	RM	Buteo_buteo	NA	Ad	1	B2	1	0	3	0	0	0	0	53.48	53.48	0
457	2018	1	Inv	16:00:00	10	65	14	0	Bal	-7.9544	37.6173	Sete	RM	Buteo_buteo	NA	Ad	1	Pos2	1	1	1	0	34.89	0	0	0	0	1
458	2018	1	Inv	09:00:00	9	84	16	0.7	Bal	-7.8078	37.6323	Romeiras	RM	Falco_peregrinus	M	Ad	1	B1	1	0	3	0	0	100.07	0	0	244.95	0
459	2018	1	Inv	09:15:00	9	84	16	0.7	Bal	-7.8966	37.6361	Figueirinha	RM	Buteo_buteo	NA	Ad	1	Pos1	1	1	0	0	0	0	0	260.69	260.69	1
460	2018	1	Inv	09:17:00	9	84	16	0.7	Bal	-7.8966	37.6361	Figueirinha	RM	Buteo_buteo	NA	Ad	1	Pos3	1	1	1	0	0	0	0	260.69	260.69	1
461	2018	1	Inv	08:57:00	14	66	5	0	BB	-6.932	39.9692	Monfortinho	RM	Milvusmilvus	NA	Ad	1	B1	0	NA	3	0	0	34.37	0	123.3	123.3	0
462	2018	1	Inv	08:57:00	14	66	5	0	BB	-6.932	39.9692	Monfortinho	RM	Buteo_buteo	NA	Ad	1	A1	0	NA	2	0	0	34.37	0	123.3	123.3	0
463	2018	1	Inv	09:01:00	14	66	5	0	BB	-7.071	39.8685	Zebreira	RM	Buteo_buteo	NA	Ad	1	A1	0	NA	2	0	0	10.92	0	0	0	0
464	2018	1	Inv	10:00:00	14	66	5	0	BB	-7.135	39.721	Rosmaninhal	BUI	Gyps_fulvus	NA	Juv	2	B1	0	NA	5	1	61.71	39.52	0	0	144.16	0
465	2018	1	Inv	10:00:00	14	66	5	0	BB	-7.135	39.721	Rosmaninhal	BUI	Gyps_fulvus	NA	Juv	2	A1	0	NA	2	1	61.71	39.52	0	0	144.16	0
466	2018	1	Inv	10:05:00	13	78	1	0	BB	-7.071	39.8685	Zebreira	RM	Buteo_buteo	NA	Ad	1	A1	0	NA	2	0	0	10.92	0	0	0	0
467	2018	1	Inv	10:09:00	13	78	1	0	BB	-7.071	39.8685	Zebreira	RM	Buteo_buteo	NA	Ad	1	B1	0	NA	3	0	0	10.92	0	0	0	0
468	2018	1	Inv	10:52:00	15	54	2	0	BB	-7.071	39.8685	Zebreira	PR	Falco_tinnunculus	H	Ad	1	A1	0	NA	2	0	0	10.92	0	0	0	0
469	2018	1	Inv	15:20:00	14	48	3	0	BB	-7.071	39.8685	Zebreira	RM	Buteo_buteo	NA	Ad	1	B2	0	NA	3	0	0	10.92	0	0	0	0
470	2018	2	Inv	12:55:00	16	43	6	0	Bal	-7.66	37.641	Mertola	RM	Buteo_buteo	NA	Ad	1	Pos1	1	1	0	0	89.41	73.72	0	24.99	24.99	1
471	2018	2	Inv	16:45:00	14	37	1	0	Bal	-8.0854	37.7005	Castroverde	RM	Buteo_buteo	NA	Ad	1	A1	1	0	2	0	0	0	0	56.73	56.73	0
472	2018	2	Inv	17:45:00	10	54	7	0	Bal	-7.9544	37.6173	Sete	RM	Buteo_buteo	NA	Ad	1	Pos1	1	1	0	0	34.89	0	0	55.76	55.76	1
473	2018	2	Inv	19:30:00	7	62	7	0	Bal	-7.394	37.873	Aldea nova de Sao Bento	PR	Elanus_caeruleus	NA	Ad	1	Pos1	1	1	0	0	0	0	0	0	314.01	0
474	2018	4	Prim	11:40:00	24	51	10	0.3	BB	-6.932	39.9692	Monfortinho	RM	Buteo_buteo	M	Ad	1	B2	0	NA	3	0	0	34.37	0	123.3	123.3	0
475	2018	4	Prim	11:43:00	24	51	10	0.3	BB	-6.932	39.9692	Monfortinho	PR	Falco_tinnunculus	M	Ad	1	A1	0	NA	2	0	0	34.37	0	123.3	123.3	0
476	2018	4	Prim	11:43:00	24	51	10	0.3	BB	-6.932	39.9692	Monfortinho	PR	Falco_tinnunculus	H	Ad	1	A1	0	NA	2	0	0	34.37	0	123.3	123.3	0
477	2018	4	Prim	12:15:00	24	51	10	0.3	BB	-7.1997	39.9018	Idanha a nova	GA	Circaetus_gallicus	NA	Ad	1	Pos1	1	1	0	0	33.92	56.28	43.23	0	0	0
478	2018	4	Prim	13:45:00	23	44	14	0	BB	-7.071	39.8685	Zebreira	GA	Circaetus_gallicus	NA	Ad	1	A1	0	NA	2	0	0	10.92	0	0	0	0
479	2018	4	Prim	14:10:00	23	44	13	0.3	BB	-7.2754	39.8451	Ladoeiro	PR	Falco_tinnunculus	M	Ad	1	B3	0	NA	6.782	0	0	0	0	74.26	74.26	0
480	2018	4	Prim	15:30:00	20	60	12	1.2	AA	-7.44	39.052	Monforte	PR	Falco_tinnunculus	M	Ad	1	B1	0	NA	3	0	9.7	0	0	0	214.27	0
481	2018	5	Prim	15:59:00	22	40	18	0	BB	-7.135	39.721	Rosmaninhal	GA	Circaetus_gallicus	NA	Juv	1	Pos1	1	1	0	0	61.71	39.52	0	0	144.16	0
482	2018	5	Prim	20:50:00	16	62	6	0	BB	-7.071	39.8685	Zebreira	GA	Circaetus_gallicus	M	Ad	1	B1	0	NA	4	0	0	10.92	0	0	0	0
483	2018	5	Prim	20:58:00	16	62	6	0	BB	-7.071	39.8685	Zebreira	RM	Buteo_buteo	NA	Ad	1	A1	0	NA	2	0	0	10.92	0	0	0	0
484	2018	5	Prim	11:00:00	26	33	7	0	BB	-6.9979	39.8212	Segura	GA	Circaetus_gallicus	NA	Ad	1	A1	0	NA	2	0	21.91	0	62.42	0	0	0
485	2018	5	Prim	11:15:00	26	33	7	0	BB	-7.135	39.721	Rosmaninhal	GA	Circaetus_gallicus	NA	Ad	1	Pos1	1	1	0	0	61.71	39.52	0	0	144.16	0
486	2018	5	Prim	11:20:00	26	33	7	0	BB	-7.135	39.721	Rosmaninhal	RM	Buteo_buteo	NA	Ad	1	A1	0	NA	2	0	61.71	39.52	0	0	144.16	0
487	2018	5	Prim	12:00:00	26	33	7	0	BB	-7.135	39.721	Rosmaninhal	GA	Circaetus_gallicus	NA	Ad	1	Pos1	1	1	0	0	61.71	39.52	0	0	144.16	0
488	2018	5	Prim	19:55:00	14	76	9	0	BB	-6.9979	39.8212	Segura	BUI	Gyps_fulvus	NA	Ad	1	A1	0	NA	2	0	21.91	0	62.42	0	0	0
489	2018	5	Prim	20:05:00	17	55	15	0.7	BB	-7.071	39.8685	Zebreira	GA	Circaetus_gallicus	H	Ad	1	B1	0	NA	4	0	0	10.92	0	0	0	0
490	2018	5	Prim	20:06:00	17	55	15	0.7	BB	-7.071	39.8685	Zebreira	GA	Circaetus_gallicus	M	Ad	1	B1	0	NA	4	0	0	10.92	0	0	0	0
491	2018	5	Prim	20:10:00	17	55	15	0.7	BB	-7.071	39.8685	Zebreira	GA	Circaetus_gallicus	M	Ad	1	B1	0	NA	4	0	0	10.92	0	0	0	0
492	2018	6	Ver	20:00:00	14	71	12	0	BB	-7.135	39.721	Rosmaninhal	GA	Circaetus_gallicus	M	Ad	1	B1	1	0	4	0	61.71	39.52	0	0	144.16	0
493	2018	6	Ver	15:55:00	30	24	17	0	Bal	-7.394	37.873	Aldea nova de Sao Bento	RM	Buteo_buteo	NA	Ad	1	B1	1	0	3	0	0	0	0	0	314.01	0
494	2018	6	Ver	12:00:00	35	25	8	0	Bal	-7.806	37.614	Sao Joao dos Caldeiros	GA	Circaetus_gallicus	NA	Inm	1	Pos1	1	1	0	0	0	0	0	0	0	0
495	2018	6	Ver	12:00:00	35	25	8	0	Bal	-7.806	37.614	Sao Joao dos Caldeiros	GA	Circaetus_gallicus	NA	Inm	1	Pos1	1	1	0	0	0	121.96	0	0	0	0
496	2018	6	Ver	21:15:00	25	50	12	0	AlCe	-7.2556	38.301	Granja	GA	Circaetus_gallicus	NA	Ad	1	Pos2	1	1	1	0	0	0	0	87.68	87.68	1
497	2018	6	Ver	12:38:00	28	33	5	0	BB	-7.135	39.721	Rosmaninhal	RM	Buteo_buteo	M	Ad	1	B1	0	NA	3	0	61.71	39.52	0	0	144.16	0
498	2018	6	Ver	12:44:00	28	33	5	0	BB	-7.135	39.721	Rosmaninhal	PR	Elanus_caeruleus	NA	Ad	1	A1	0	NA	2	0	61.71	39.52	0	0	144.16	0
499	2018	6	Ver	12:45:00	33	21	12	0	BB	-7.2754	39.8451	Ladoeiro	GA	Circaetus_gallicus	M	Ad	1	A1	0	NA	2	0	0	0	0	74.26	74.26	0
500	2018	6	Ver	20:30:00	20	65	9	0	BB	-7.071	39.8685	Zebreira	RM	Milvusmigrans	M	Ad	2	B2	0	NA	3	1	0	10.92	0	0	0	0
501	2018	6	Ver	20:30:00	20	65	9	0	BB	-7.071	39.8685	Zebreira	RM	Milvusmigrans	H	Ad	2	B1	0	NA	3	1	0	10.92	0	0	0	0
502	2018	6	Ver	20:50:00	20	65	9	0	BB	-7.071	39.8685	Zebreira	PR	Falco_tinnunculus	M	Ad	1	B2	0	NA	3	0	0	10.92	0	0	0	0
503	2018	6	Ver	20:55:00	20	65	9	0	BB	-7.071	39.8685	Zebreira	RM	Buteo_buteo	NA	Ad	1	B2	0	NA	3	0	0	10.92	0	0	0	0
504	2018	7	Ver	10:13:00	20	61	12	0	Bal	-7.231	38.104	Safara	PR	Elanus_caeruleus	M	Ad	1	A1	0	NA	2	0	0	0	0	245.68	245.68	1
505	2018	7	Ver	10:13:00	20	61	12	0	Bal	-7.231	38.104	Safara	PR	Elanus_caeruleus	H	Ad	1	A1	0	NA	2	0	0	0	0	245.68	245.68	1
506	2018	7	Ver	10:30:00	19	69	12	0	Bal	-7.394	37.873	Aldea nova de Sao Bento	RM	Buteo_buteo	NA	Ad	1	Pos1	1	1	0	0	0	0	0	0	243.11	0
507	2018	7	Ver	15:00:00	26	41	18	0	Bal	-7.7341	37.64	Morena - Mertola	GA	Circaetus_gallicus	H	Ad	1	Pos1	1	1	0	0	36.44	0	0	0	0	1
508	2018	7	Ver	08:00:00	24	48	9	0	Bal	-7.852	37.643	Pelinhos	RM	Buteo_buteo	M	Juv	1	Pos1	1	1	0	0	0	0	0	110.73	110.73	0
509	2018	7	Ver	08:00:00	24	48	9	0	Bal	-7.852	37.643	Pelinhos	RM	Buteo_buteo	M	Juv	1	B3	1	0	8.226	0	0	0	0	110.73	110.73	0
510	2018	7	Ver	08:24:00	24	48	9	0	Bal	-7.852	37.643	Pelinhos	RM	Buteo_buteo	M	Juv	1	B3	1	0	8.226	0	0	0	0	110.73	110.73	0
511	2018	7	Ver	20:56:00	28	52	18	0	Bal	-7.7315	37.6097	Brites Gomes	GA	Circaetus_gallicus	NA	Ad	1	B1	1	0	4	0	0	19.84	0	13.79	13.79	1
512	2018	7	Ver	20:30:00	31	61	12	0	BB	-7.46	39.8028	Castelo branco	GA	Aquila_adalberti	H	Ad	1	B1	0	NA	4	0	11.33	63.88	0	0	87.66	0
513	2018	7	Ver	21:13:00	31	61	12	0	BB	-7.2754	39.8451	Ladoeiro	PR	Elanus_caeruleus	NA	Ad	1	A1	0	NA	2	0	0	0	0	74.26	74.26	0
514	2018	7	Ver	21:25:00	31	61	12	0	BB	-7.071	39.8685	Zebreira	GA	Circaetus_gallicus	H	Ad	1	B1	1	0	4	0	0	10.92	0	0	0	0
515	2018	7	Ver	15:00:00	31	31	14	0	AlCe	-7.287	38.3639	Mourao	RM	Buteo_buteo	M	Ad	1	B1	1	0	3	0	0	0	0	8.88	8.88	1
516	2018	7	Ver	15:00:00	31	31	14	0	AlCe	-7.287	38.3639	Mourao	RM	Buteo_buteo	H	Ad	1	Pos1	1	1	0	0	0	0	0	8.88	8.88	1
517	2018	7	Ver	15:09:00	31	31	14	0	AlCe	-7.287	38.3639	Mourao	RM	Hieraaetus_pennatus	NA	Ad	1	B1	1	0	3	0	0	0	0	8.88	8.88	1
518	2018	7	Ver	15:13:00	30	35	19	0	Bal	-7.5599	37.6468	Moreanes	PR	Falco_tinnunculus	M	Ad	1	B3	1	0	6.782	0	6.86	0	0	77.22	77.22	1
519	2018	7	Ver	15:13:00	30	35	19	0	Bal	-7.5599	37.6468	Moreanes	PR	Falco_tinnunculus	M	Ad	1	B1	1	0	3	0	6.86	0	0	77.22	77.22	1
520	2018	7	Ver	15:13:00	31	31	14	0	AlCe	-7.287	38.3639	Mourao	PR	Falco_tinnunculus	M	Ad	1	B3	1	0	6.782	0	0	0	0	8.88	8.88	1
521	2018	7	Ver	15:19:00	31	31	14	0	AlCe	-7.2556	38.301	Granja	GA	Circaetus_gallicus	H	Ad	1	Pos1	1	1	0	0	0	0	0	87.68	87.68	1
522	2018	7	Ver	16:48:00	26	35	23	0	Bal	-7.5013	37.8075	Vales mortos	GA	Circaetus_gallicus	NA	Inm	1	B1	1	0	4	0	95.63	0	0	0	0	0
523	2018	7	Ver	10:27:00	20	74	9	0	Bal	-7.852	37.643	Pelinhos	RM	Buteo_buteo	NA	Ad	1	Pos1	1	1	0	0	0	0	0	110.73	110.73	0
524	2018	7	Ver	14:25:00	30	28	13	0	Bal	-7.66	37.641	Mertola	GA	Circaetus_gallicus	NA	Ad	1	Pos1	1	1	0	0	89.41	73.72	0	24.99	24.99	1
525	2018	7	Ver	14:40:00	30	28	13	0	Bal	-7.66	37.641	Mertola	PR	Falco_tinnunculus	M	Ad	1	B1	1	0	3	0	89.41	73.72	0	24.99	24.99	1
526	2018	7	Ver	14:59:00	30	28	13	0	Bal	-7.5013	37.8075	Vales mortos	PR	Elanus_caeruleus	NA	Ad	1	Pos1	1	1	0	0	95.63	0	0	0	0	0
527	2018	7	Ver	15:45:00	30	28	13	0	AA	-7.5013	37.8075	Vales mortos	RM	Buteo_buteo	NA	Ad	1	B2	1	0	3	0	95.63	0	0	0	0	0
528	2018	7	Ver	16:10:00	30	28	13	0	Bal	-7.318	37.9296	Vilaverde de Filcalho	RM	Buteo_buteo	NA	Ad	1	B1	1	0	3	0	44.65	0	0	263.38	263.38	0
529	2018	7	Ver	08:40:00	22	56	8	0	BB	-7.071	39.8685	Zebreira	RM	Buteo_buteo	NA	Ad	1	B1	0	NA	3	0	0	10.92	0	0	0	0
530	2018	7	Ver	08:50:00	22	56	8	0	BB	-7.071	39.8685	Zebreira	PR	Falco_tinnunculus	H	Ad	1	B2	0	NA	3	0	0	10.92	0	0	0	0
531	2018	7	Ver	07:29:00	17	85	8	0	BB	-7.071	39.8685	Zebreira	PR	Falco_tinnunculus	M	Ad	1	B2	0	NA	3	0	0	10.92	0	0	0	0
532	2018	7	Ver	07:59:00	17	85	8	0	BB	-7.071	39.8685	Zebreira	PR	Falco_tinnunculus	M	Ad	1	B1	0	NA	3	0	0	10.92	0	0	0	0
533	2018	7	Ver	19:25:00	34	19	17	0	AlCe	-7.287	38.3639	Mourao	PR	Falco_naumanni	M	Ad	1	B1	1	0	3	0	0	0	0	8.88	8.88	1
534	2018	7	Ver	19:30:00	34	19	17	0	AlCe	-7.287	38.3639	Mourao	PR	Falco_naumanni	M	Ad	1	B1	1	0	3	0	0	0	0	8.88	8.88	1
535	2018	7	Ver	19:31:00	34	19	17	0	AlCe	-7.287	38.3639	Mourao	PR	Falco_naumanni	H	Ad	1	B1	1	0	3	0	0	0	0	8.88	8.88	1
536	2018	7	Ver	19:34:00	34	19	17	0	AlCe	-7.2556	38.301	Granja	PR	Falco_naumanni	M	Ad	1	B1	1	0	3	0	0	0	0	87.68	87.68	1
537	2018	7	Ver	19:56:00	32	39	13	0	Bal	-7.231	38.104	Safara	PR	Falco_tinnunculus	M	Ad	1	B1	1	0	3	0	0	0	0	243.11	243.11	1
538	2018	7	Ver	20:18:00	31	40	22	0	Bal	-7.394	37.873	Aldea nova de Sao Bento	RM	Buteo_buteo	NA	Ad	1	B1	1	0	3	0	0	0	0	0	313.44	0
539	2018	7	Ver	09:08:00	22	52	10	0	Bal	-7.8966	37.6361	Figueirinha	RM	Buteo_buteo	NA	Ad	1	B2	1	0	3	0	0	0	0	260.69	260.69	1
540	2018	7	Ver	13:21:00	35	18	12	0	AlCe	-7.287	38.3639	Mourao	PR	Elanus_caeruleus	H	Juv	1	Pos1	1	1	0	0	0	0	0	8.88	8.88	1
541	2018	7	Ver	13:22:00	35	18	12	0	AlCe	-7.287	38.3639	Mourao	PR	Falco_naumanni	M	Ad	1	B2	1	0	3	0	0	0	0	8.88	8.88	1
542	2018	7	Ver	13:27:00	35	18	12	0	AlCe	-7.287	38.3639	Mourao	PR	Falco_naumanni	M	Ad	1	B2	1	0	3	0	0	0	0	8.88	8.88	1
543	2018	8	Ver	19:30:00	34	16	7	0	BB	-7.135	39.721	Rosmaninhal	PR	Elanus_caeruleus	NA	Ad	1	A1	0	NA	2	0	61.71	39.52	0	0	144.16	0
544	2018	8	Ver	19:32:00	34	16	7	0	BB	-7.135	39.721	Rosmaninhal	PR	Elanus_caeruleus	NA	Ad	1	Pos1	1	1	0	0	61.71	39.52	0	0	144.16	0
545	2013	6	Ver	2019-10-09 08:40:00	23	54	9	0	AlCe	-7.287	38.3639	Mourao	RM	Pandion_haliaetus	NA	Ad	1	A1	0	NA	2	0	0	0		305.04	8.88	0
546	2013	11	Oto	2019-10-09 09:40:00	14	67	19	0	AlCe	-7.97	38.71	Arraiolos	RM	Pandion_haliaetus	NA	Juv	1	A1	0	NA	2	0	42.94	0		78.92	33.16	0
547	2014	12	Inv	2019-10-09 10:10:00	9	82	8	0	AlCe	-7.97	38.71	Arraiolos	RM	Pandion_haliaetus	NA	Juv	1	B1	0	NA	3	0	42.94	0		78.92	33.16	0
548	2015	5	Prim	2019-10-09 07:00:00	19	59	6	0	Bal	-7.89	38.02	Beja	PR	Falco_vespertinus	H	Ad	1	Pos2	1	1	1	0	0	0	0	314.06	0	0
549	2015	11	Oto	2019-10-09 09:19:00	12	89	4	0	BB	-7.071	39.8685	Zebreira	RM	Milvusmilvus	NA	Ad	1	B1	0	NA	3	0	0	10.92	0	76.17	0	0
550	2017	1	Inv	2019-10-09 11:00:00	13	49	6	0	Bal	-7.231	38.104	Safara	GA	Aquila_fasciata	NA	Ad	1	B2	1	0	3	0	68.27	0			245.68	0
551	2017	11	Oto	2019-10-09 09:30:00	14	67	12	0	Bal	-7.89	38.02	Beja	RM	Milvusmilvus	NA	Ad	1	Pos1	1	1	0	0	0	0	0	314.06	0	0
